# Supplementary material
Source: ML conference proceedings conference paper supplement (https://openreview.net/forum?id=C1Wp4ubvXZ)

# Standard Deviation of Uncertainty Across max\_depth

## Communities

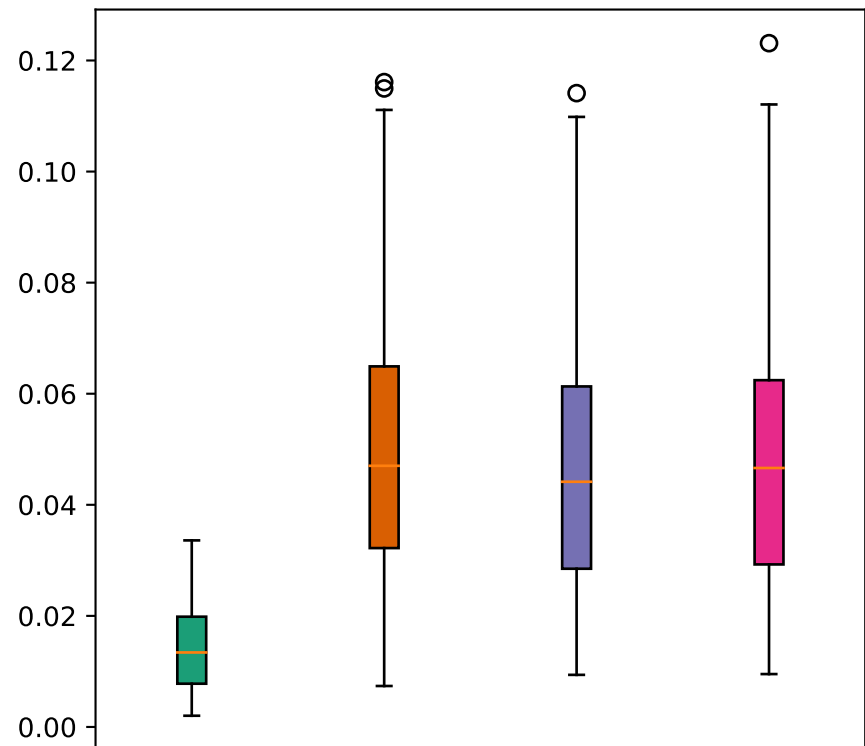

## IHDP

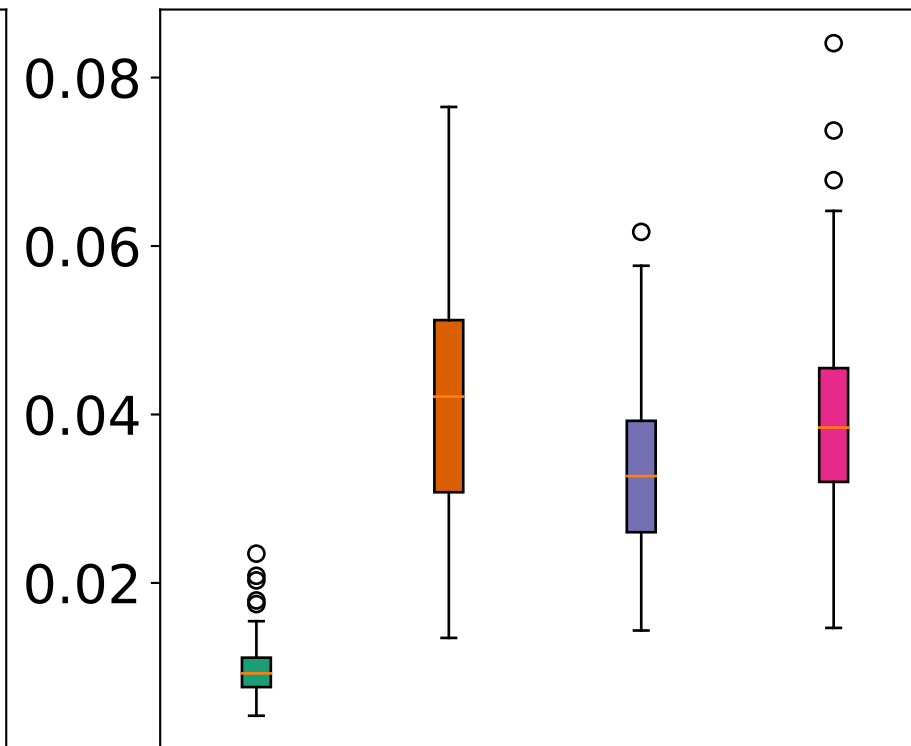

## Insurance

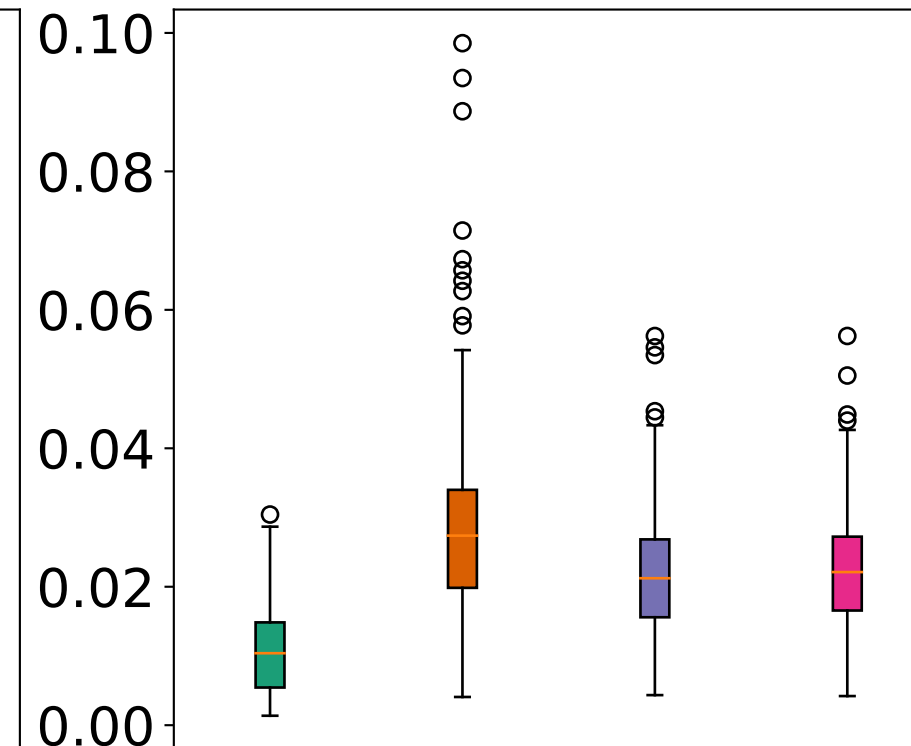

## Law School

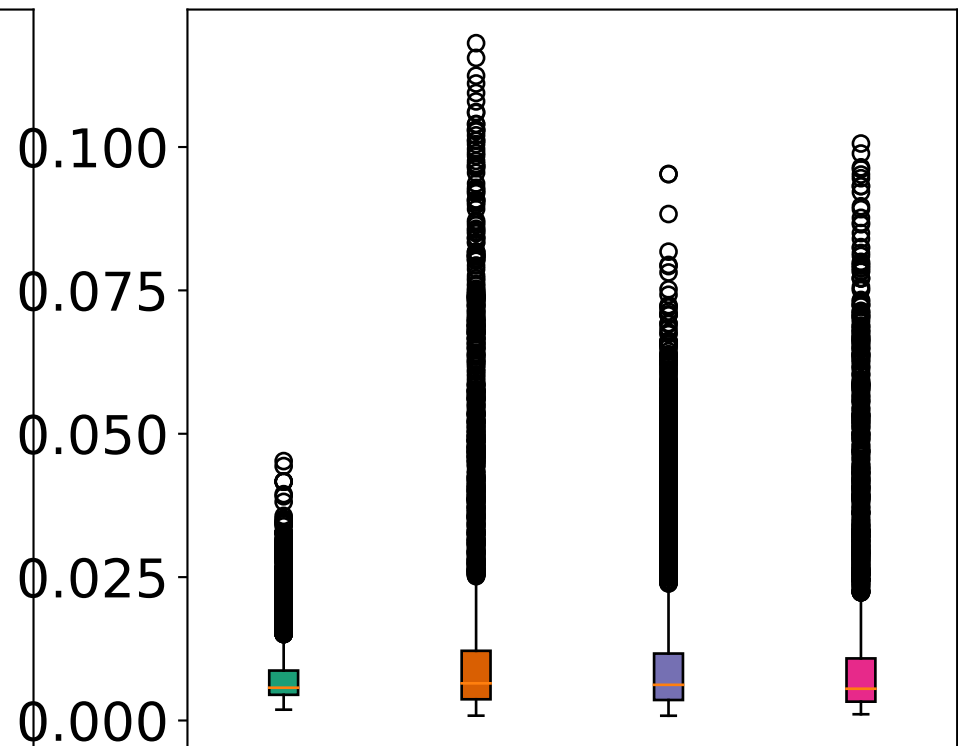

## Twins

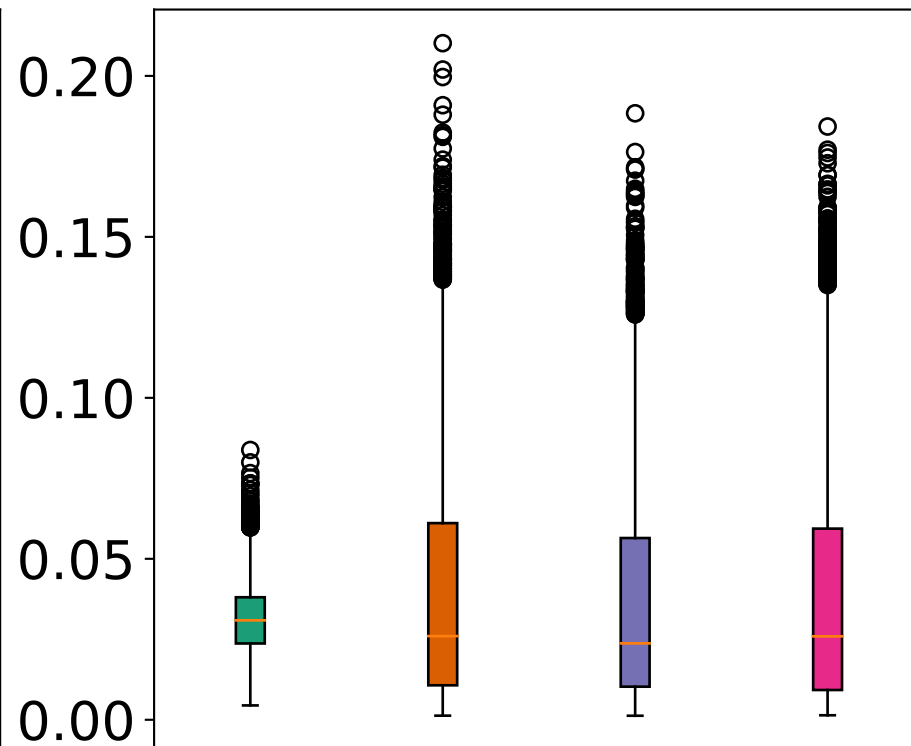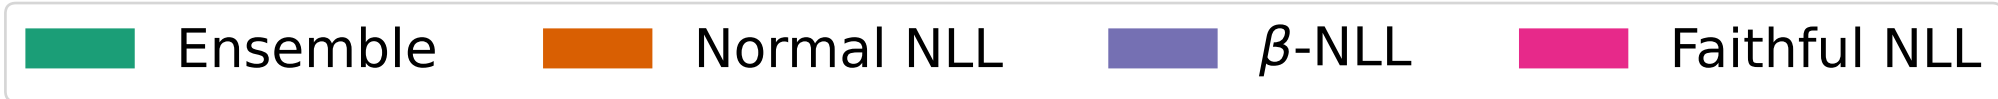

Supplement: supplementary_material [file attachment]
