# Supplementary material
Source: ML conference proceedings conference paper supplement (https://openreview.net/forum?id=C1Wp4ubvXZ)

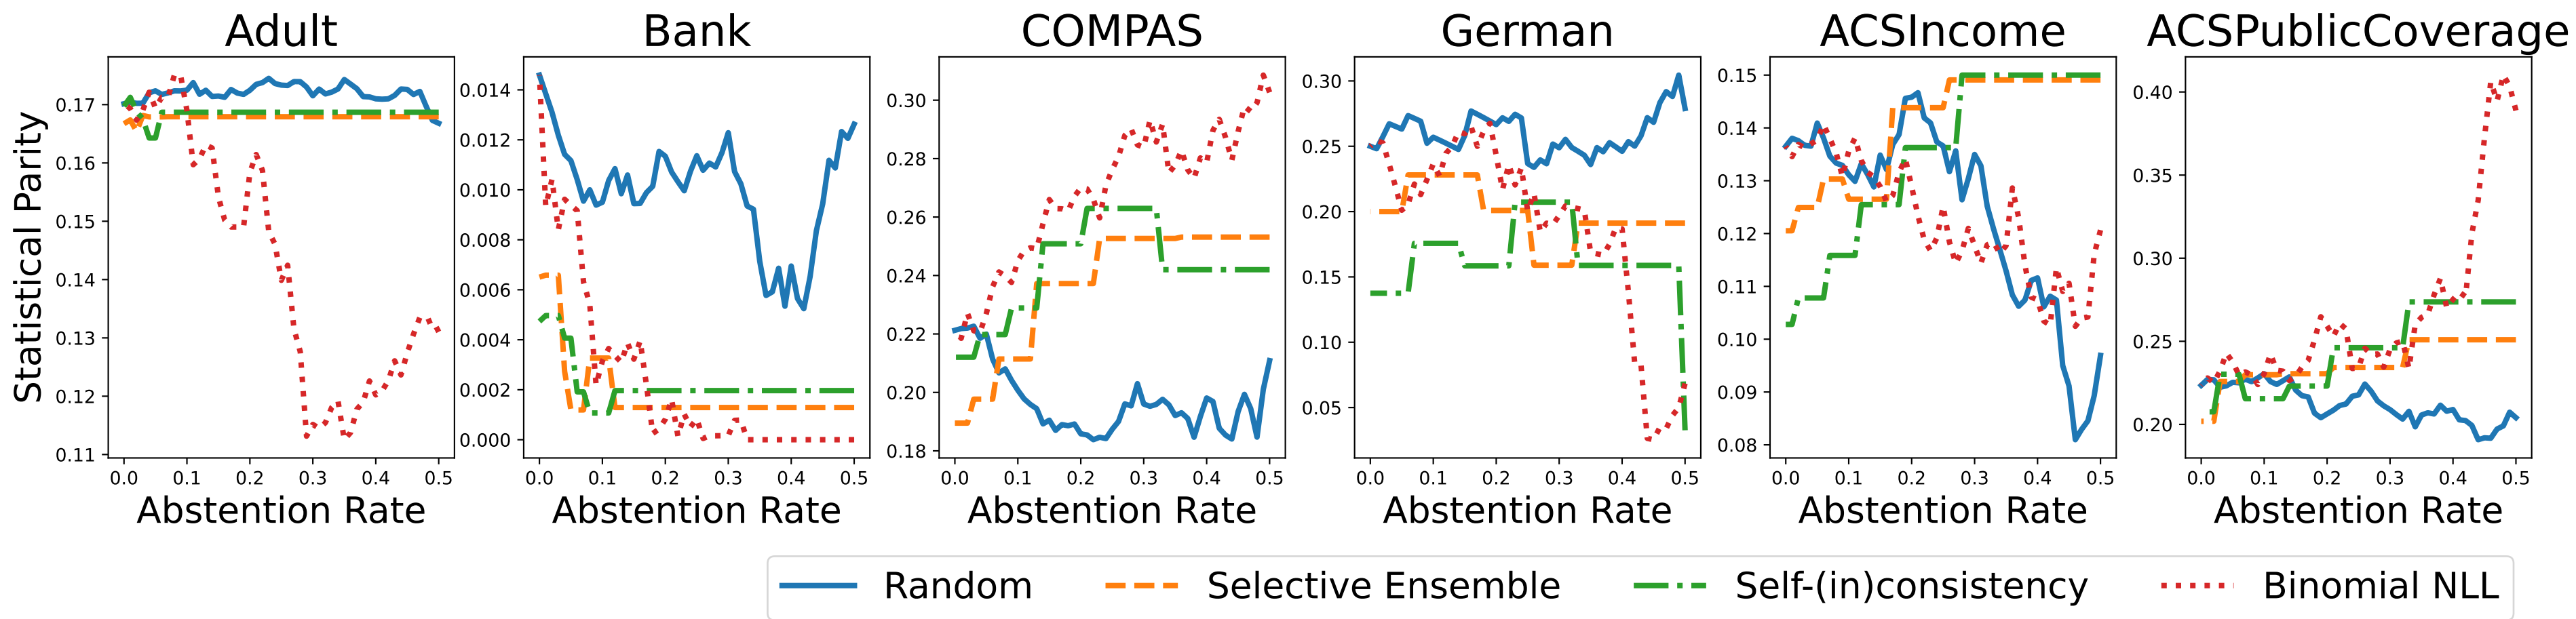

Supplement: supplementary_material [file attachment]

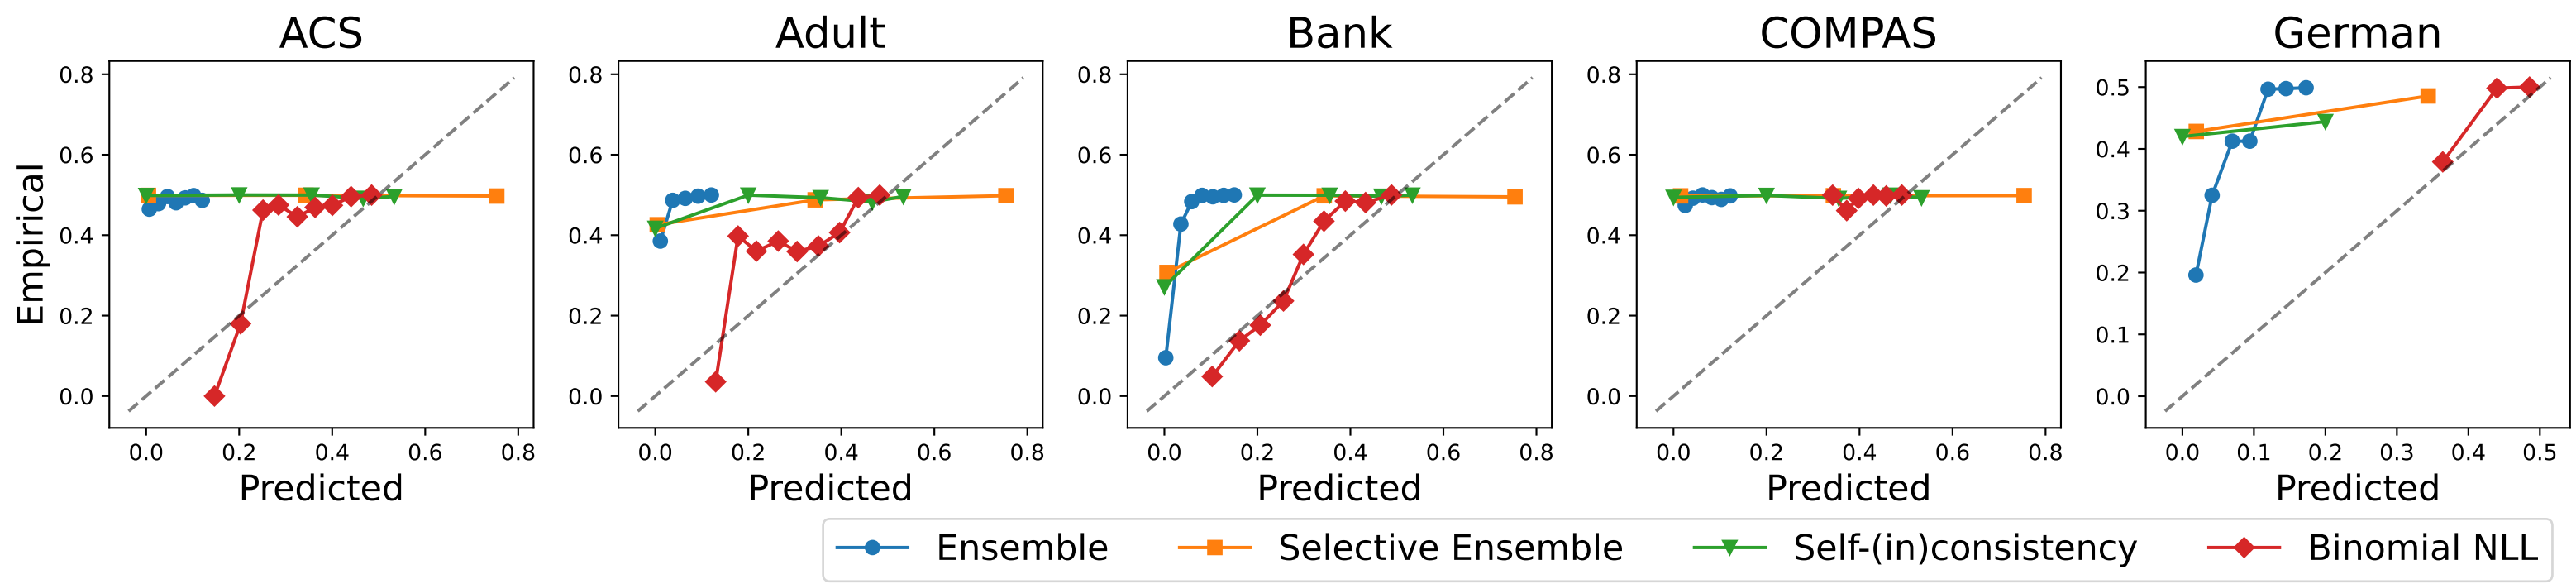

Supplement: supplementary_material [file attachment]

Min/Max Uncertainty

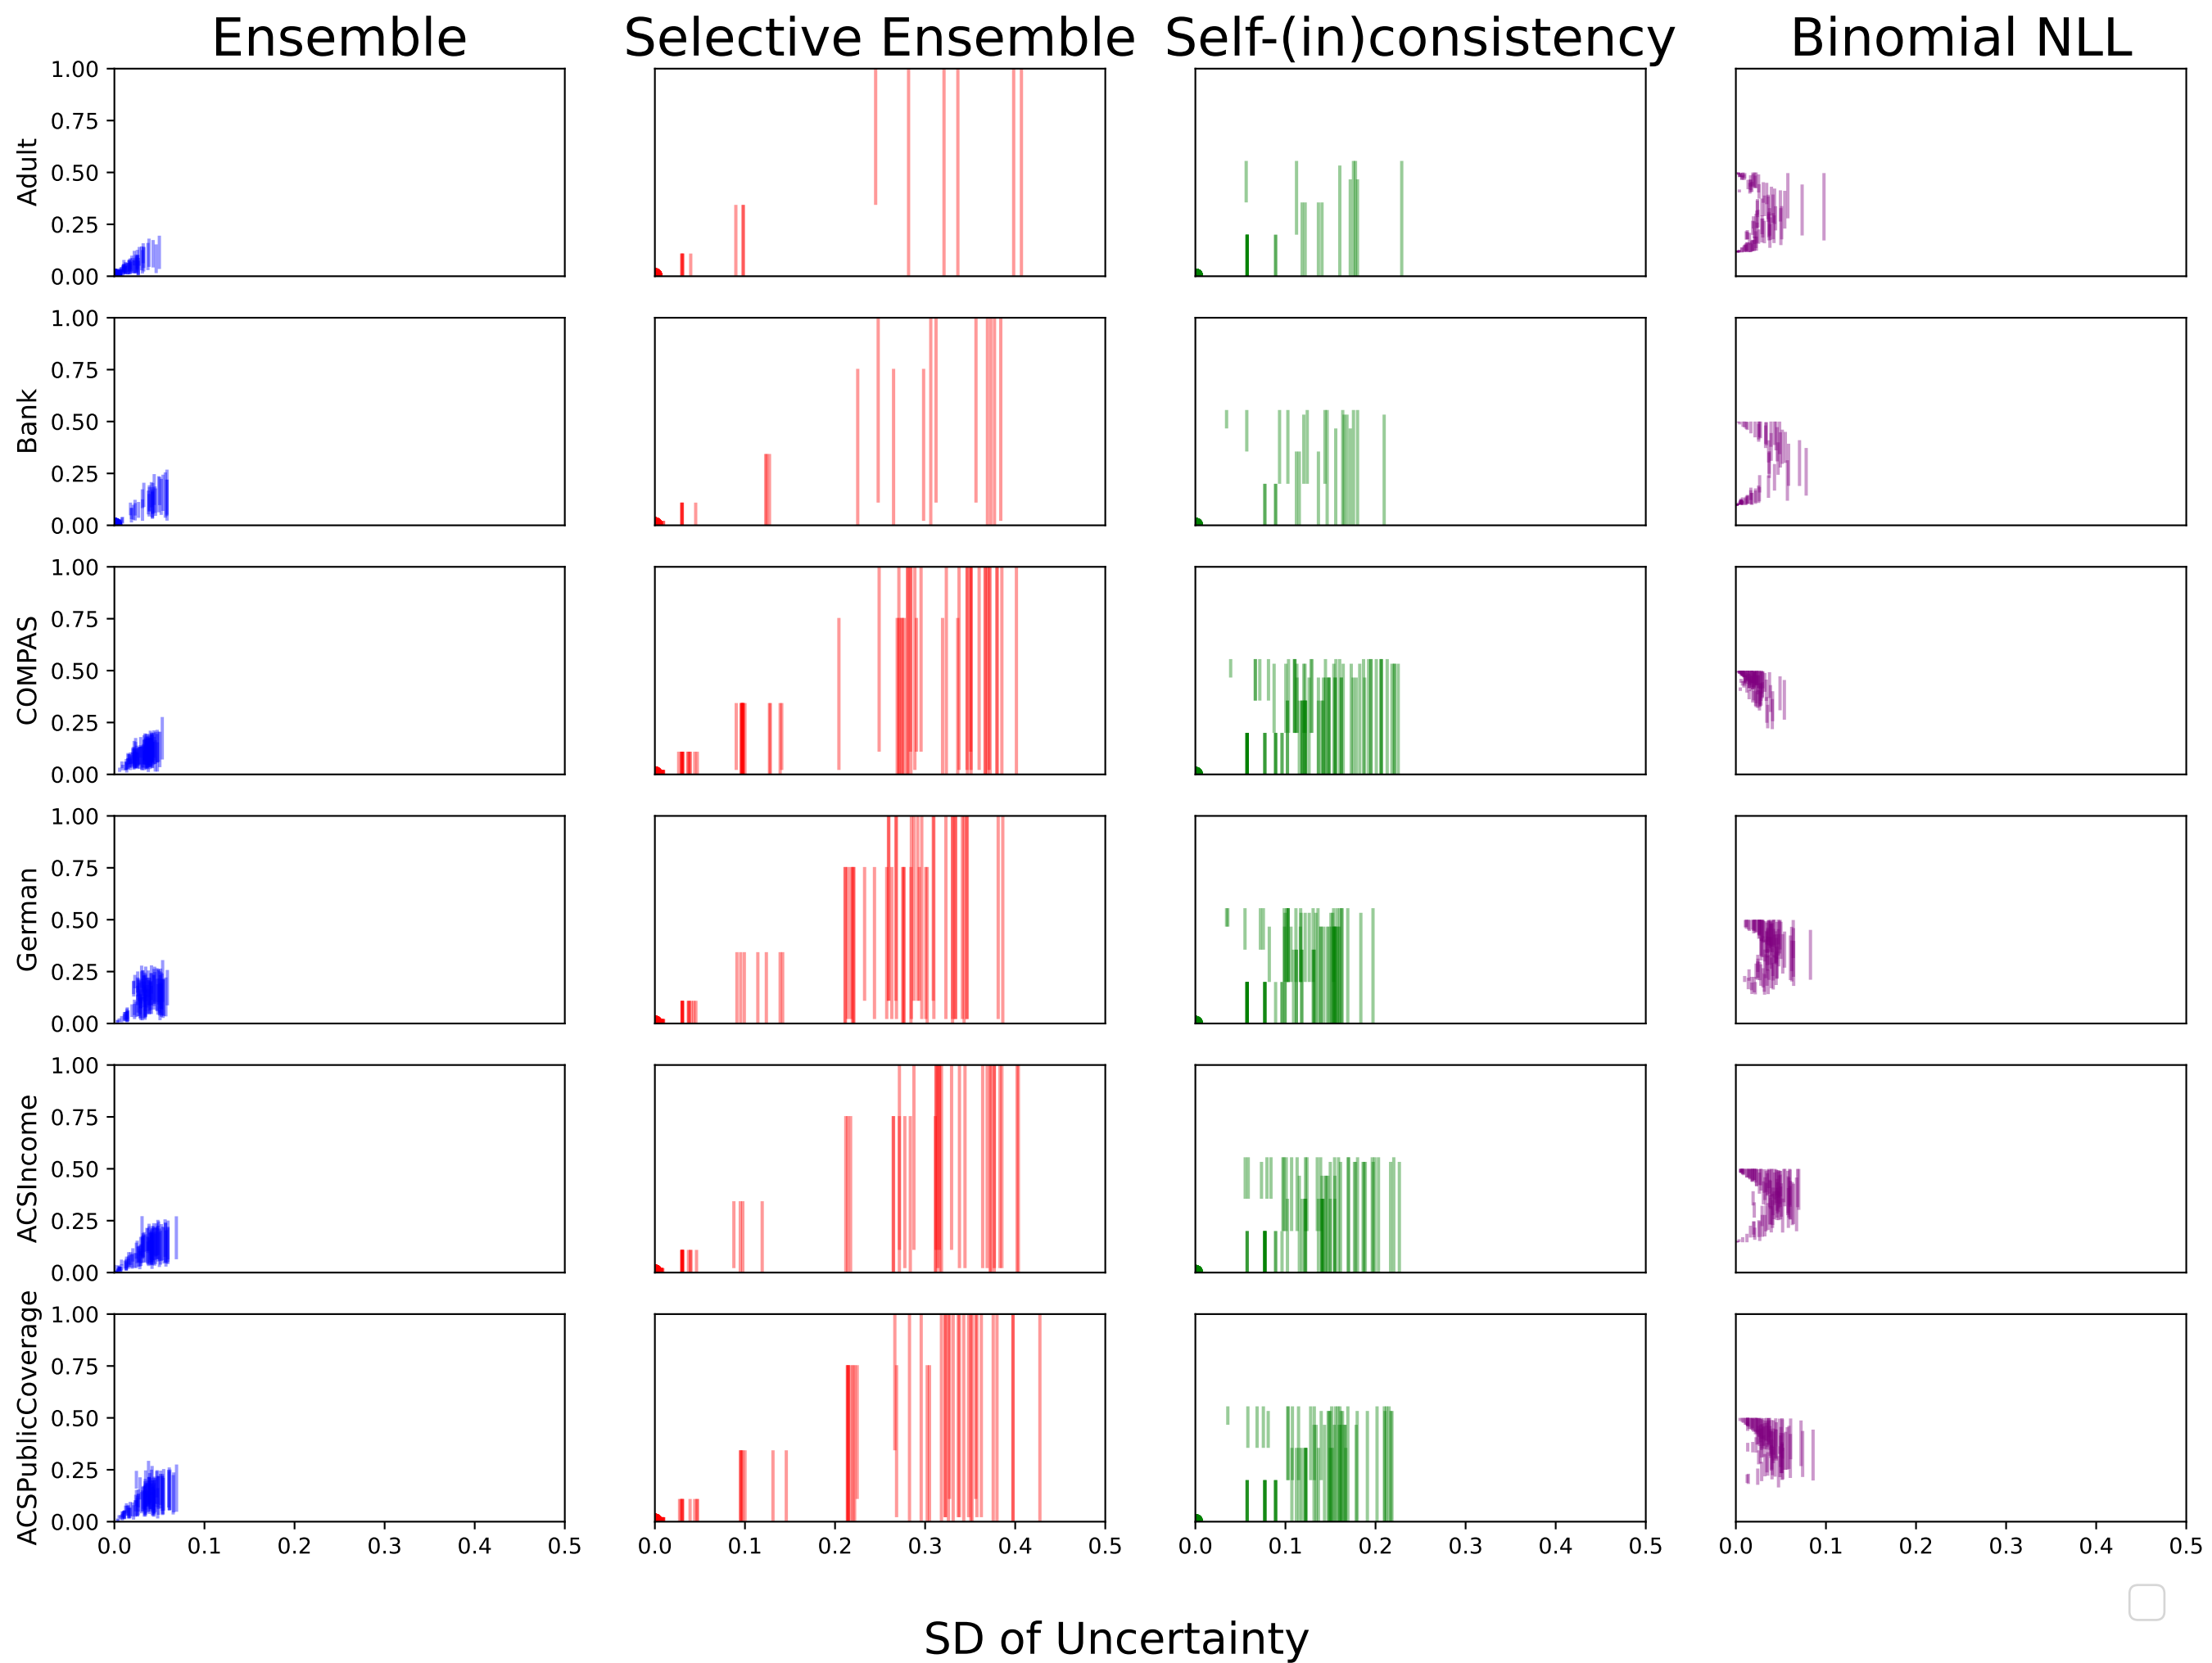

Supplement: supplementary_material [file attachment]

# Calibration for 15 Groups

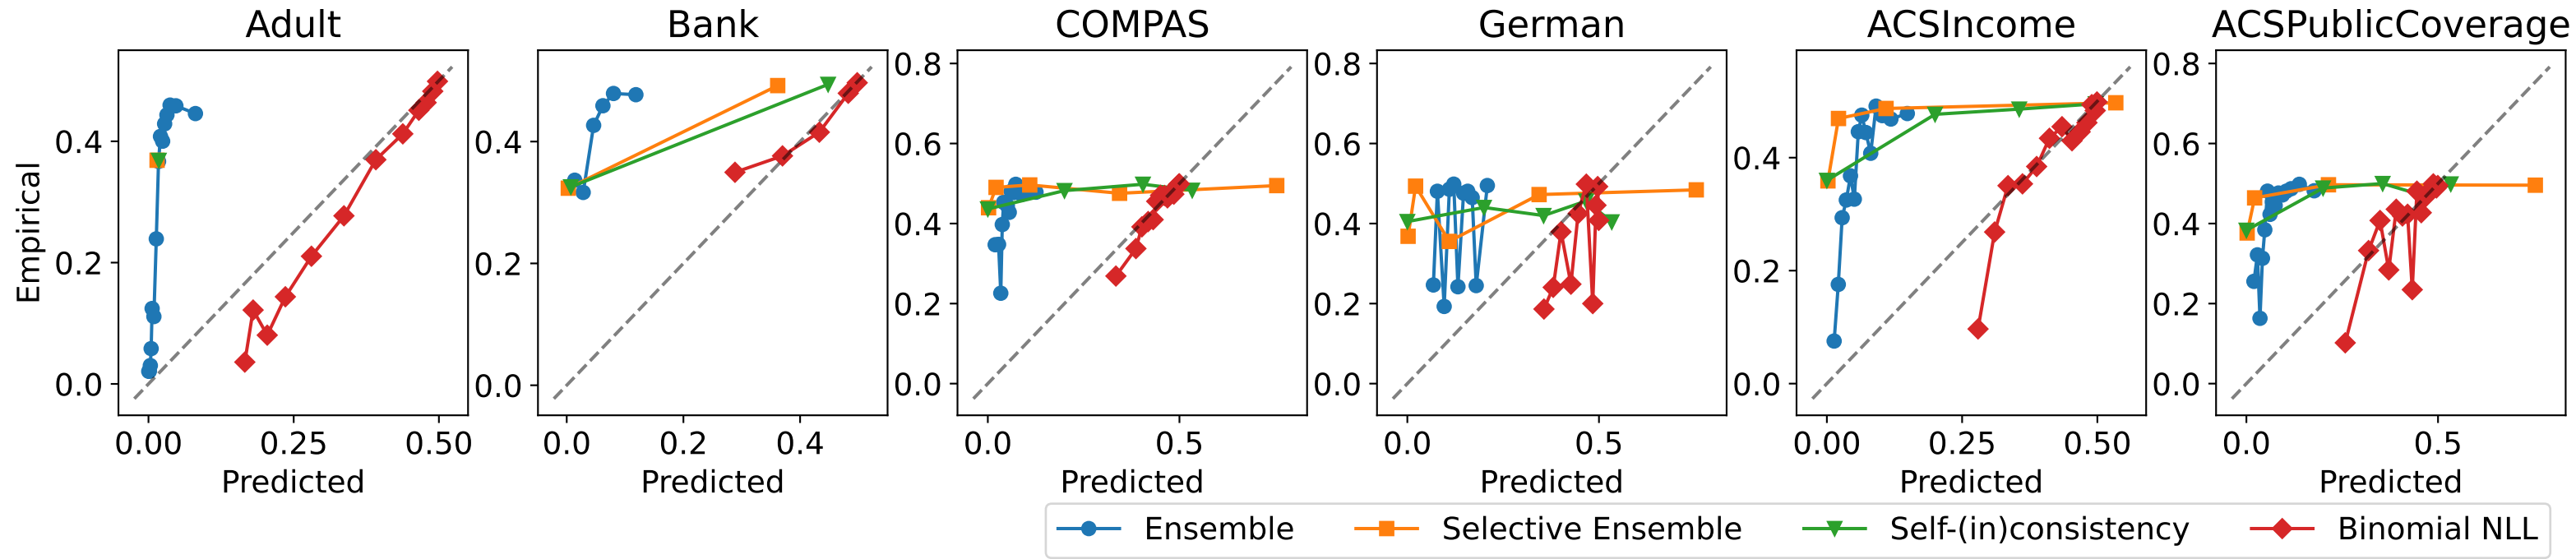

Supplement: supplementary_material [file attachment]

Communities

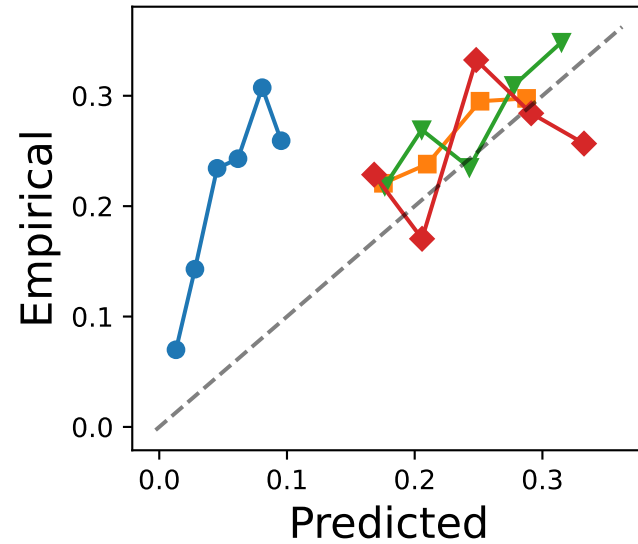

IHDP

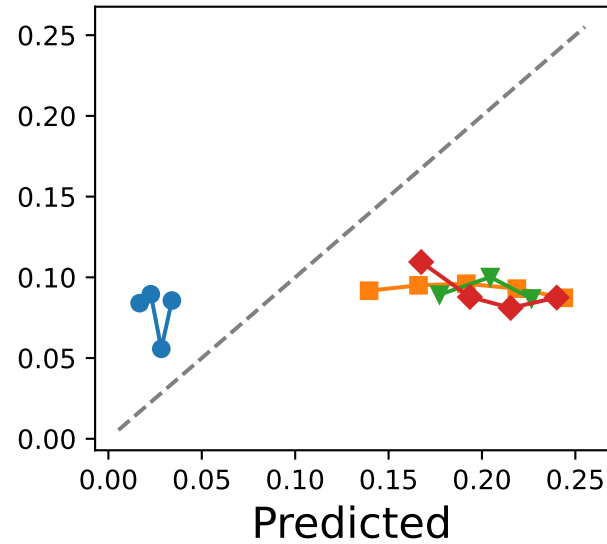

Insurance

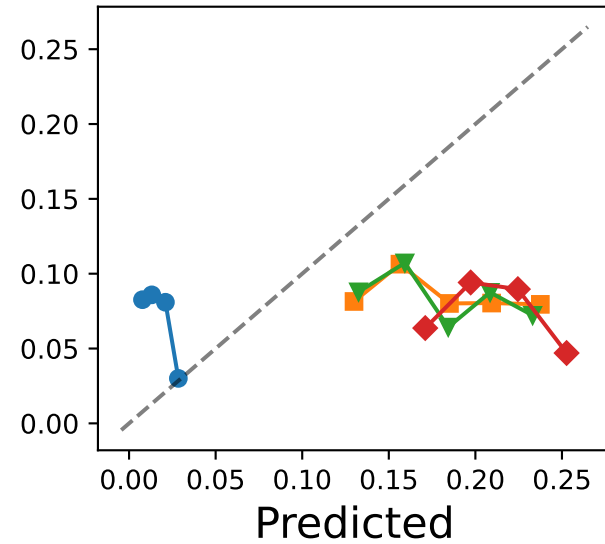

Law School

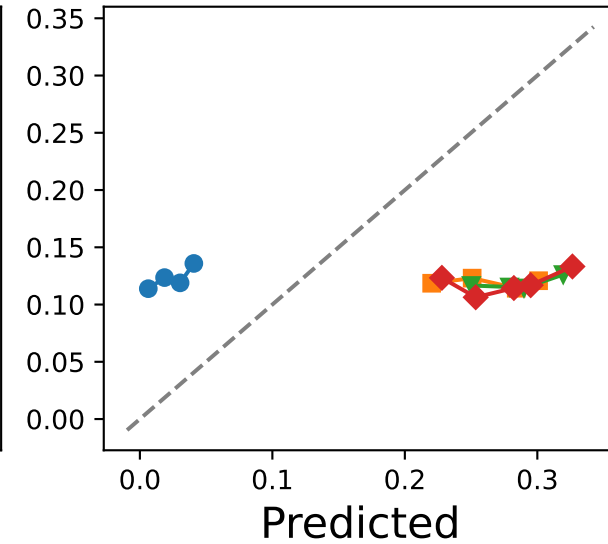

Twins

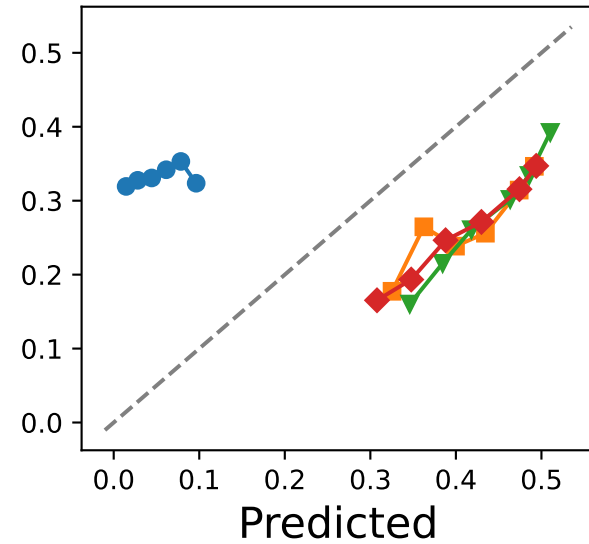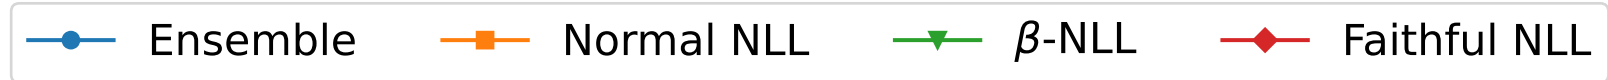

Supplement: supplementary_material [file attachment]

# Calibration for 20 Groups

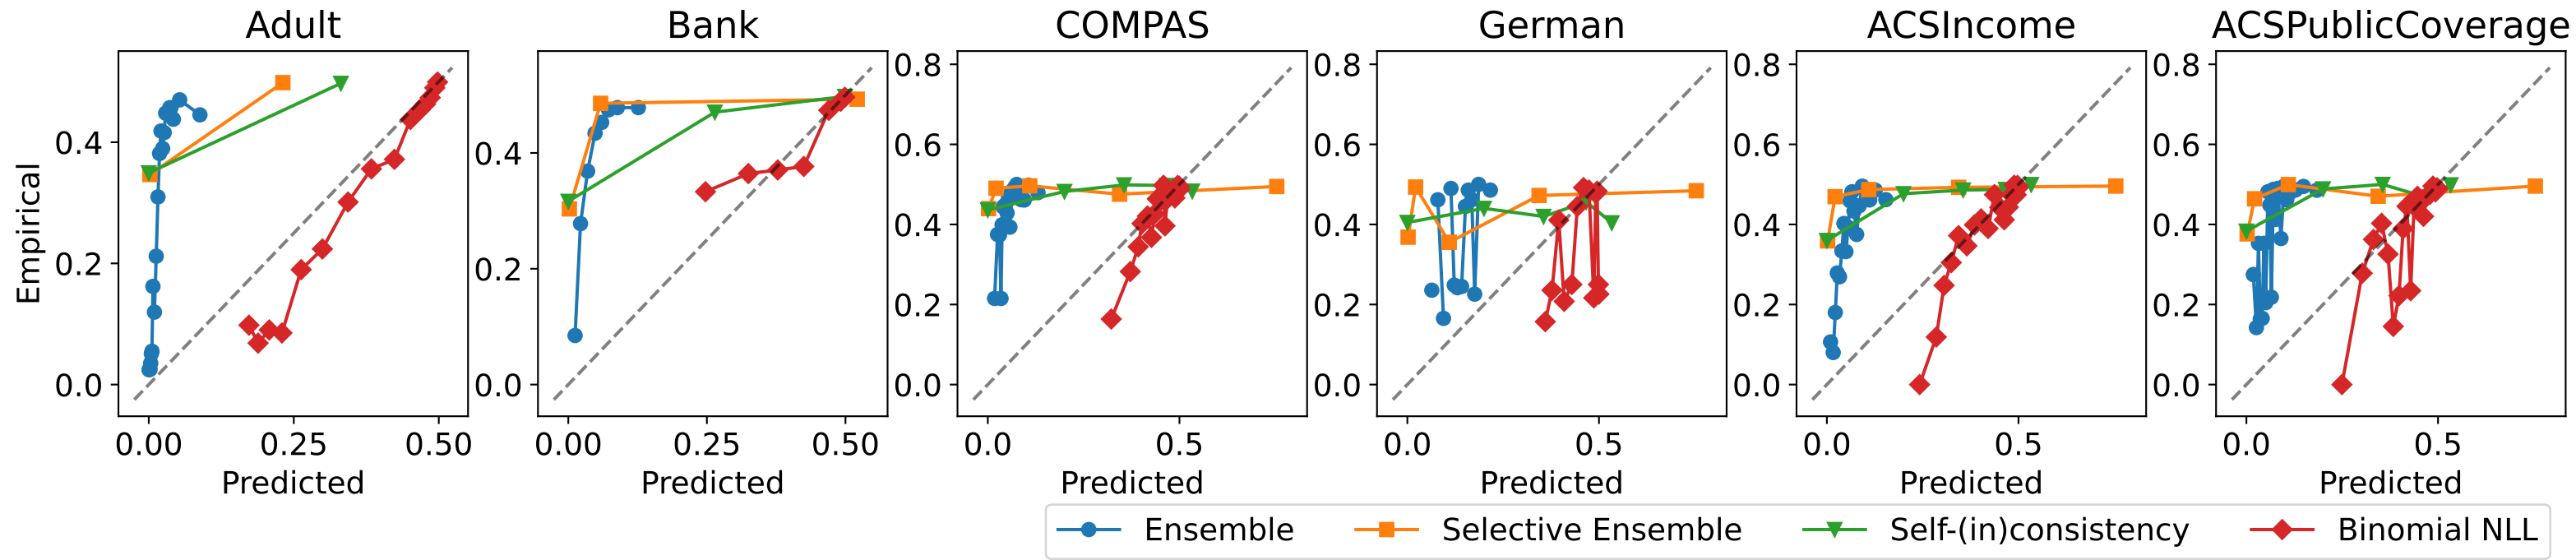

Supplement: supplementary_material [file attachment]

Standard Deviation of Uncertainty Across Reduction Thresholds

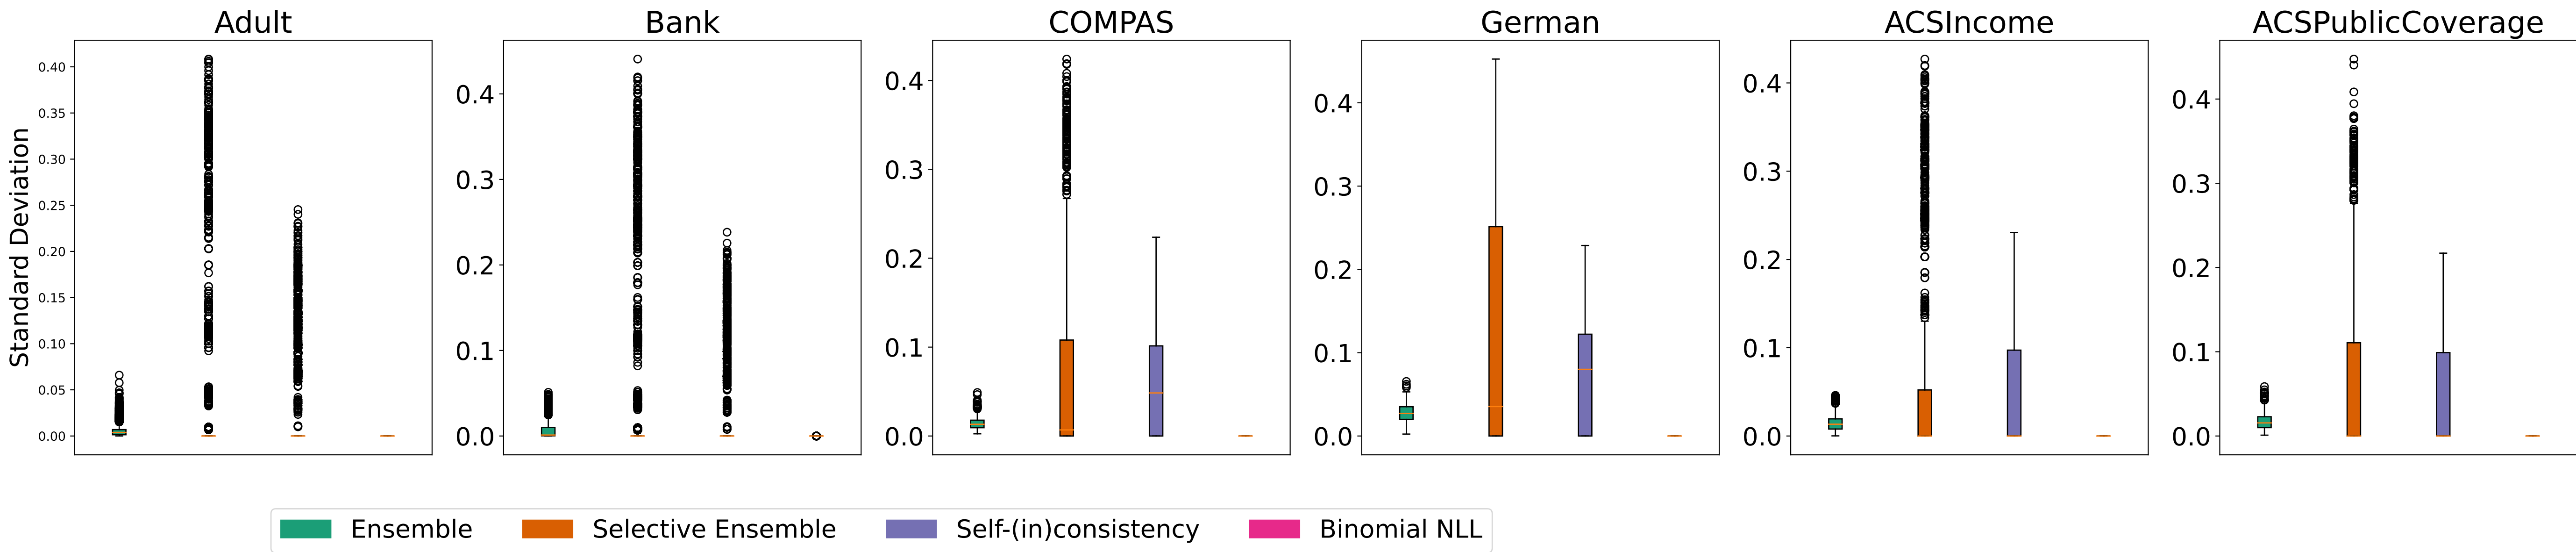

Supplement: supplementary_material [file attachment]

Area under PDFs to the left  $\tau = 0.5$

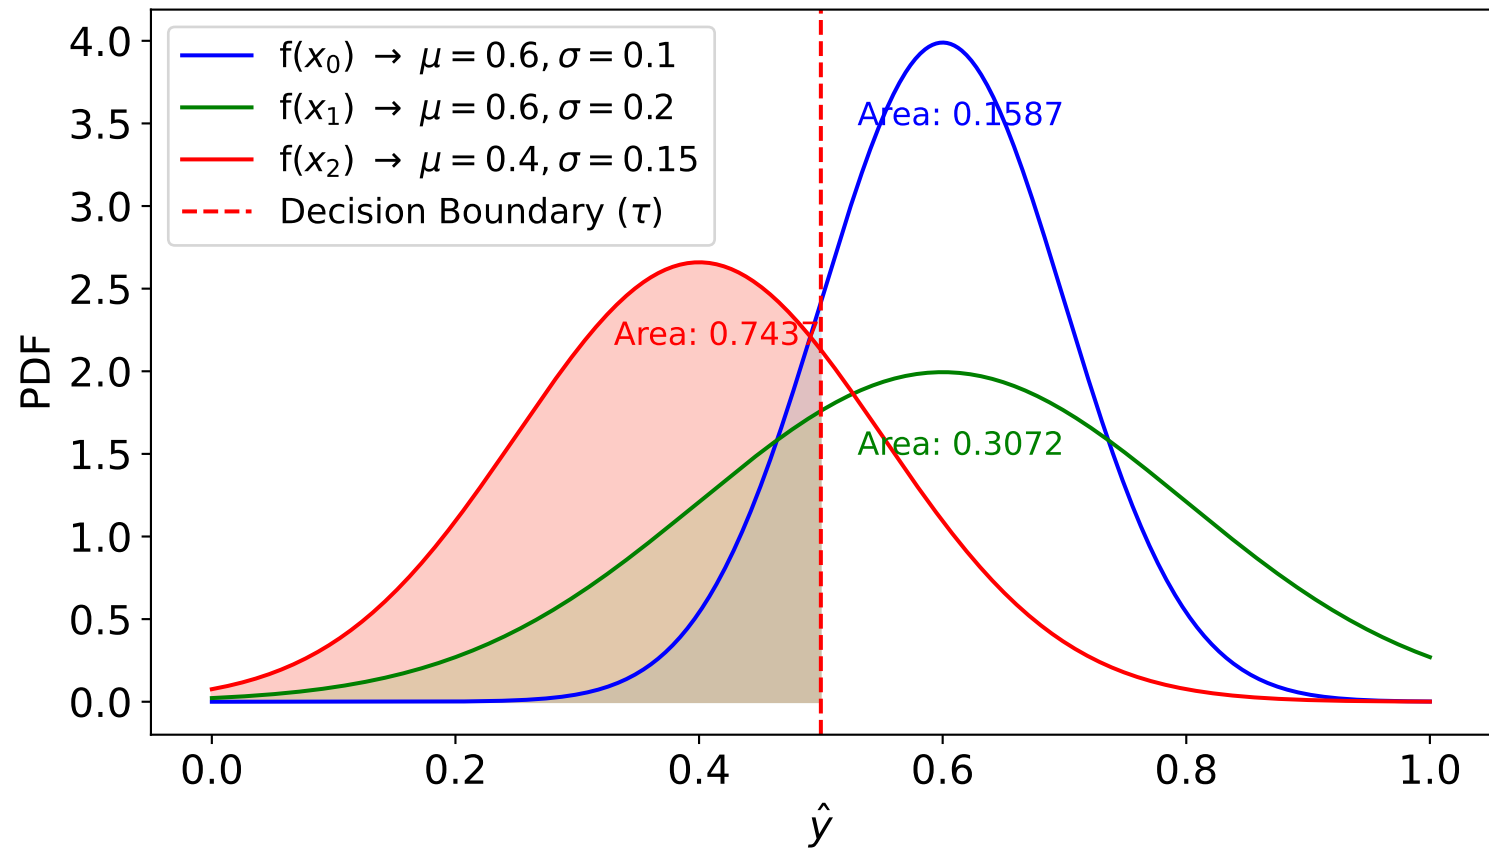

Supplement: supplementary_material [file attachment]

Area under PDFs to the right  $\tau = 0.5$

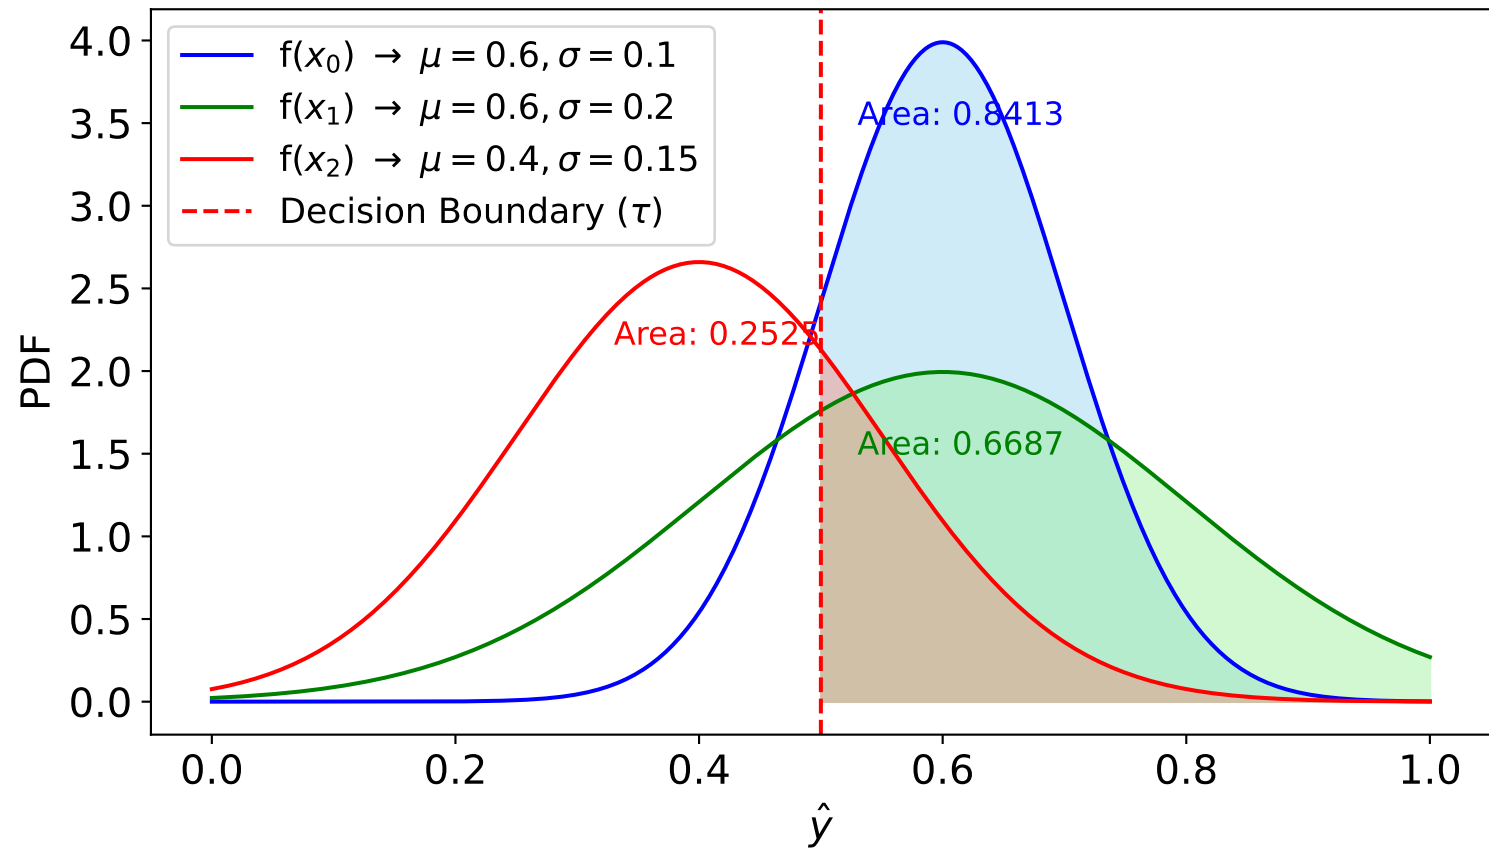

Supplement: supplementary_material [file attachment]

Normal and Induced Binomial Distribution  
 $\mu=0.6$ ,  $\sigma=0.1414213562373095$ ,  $\tau=0.5$

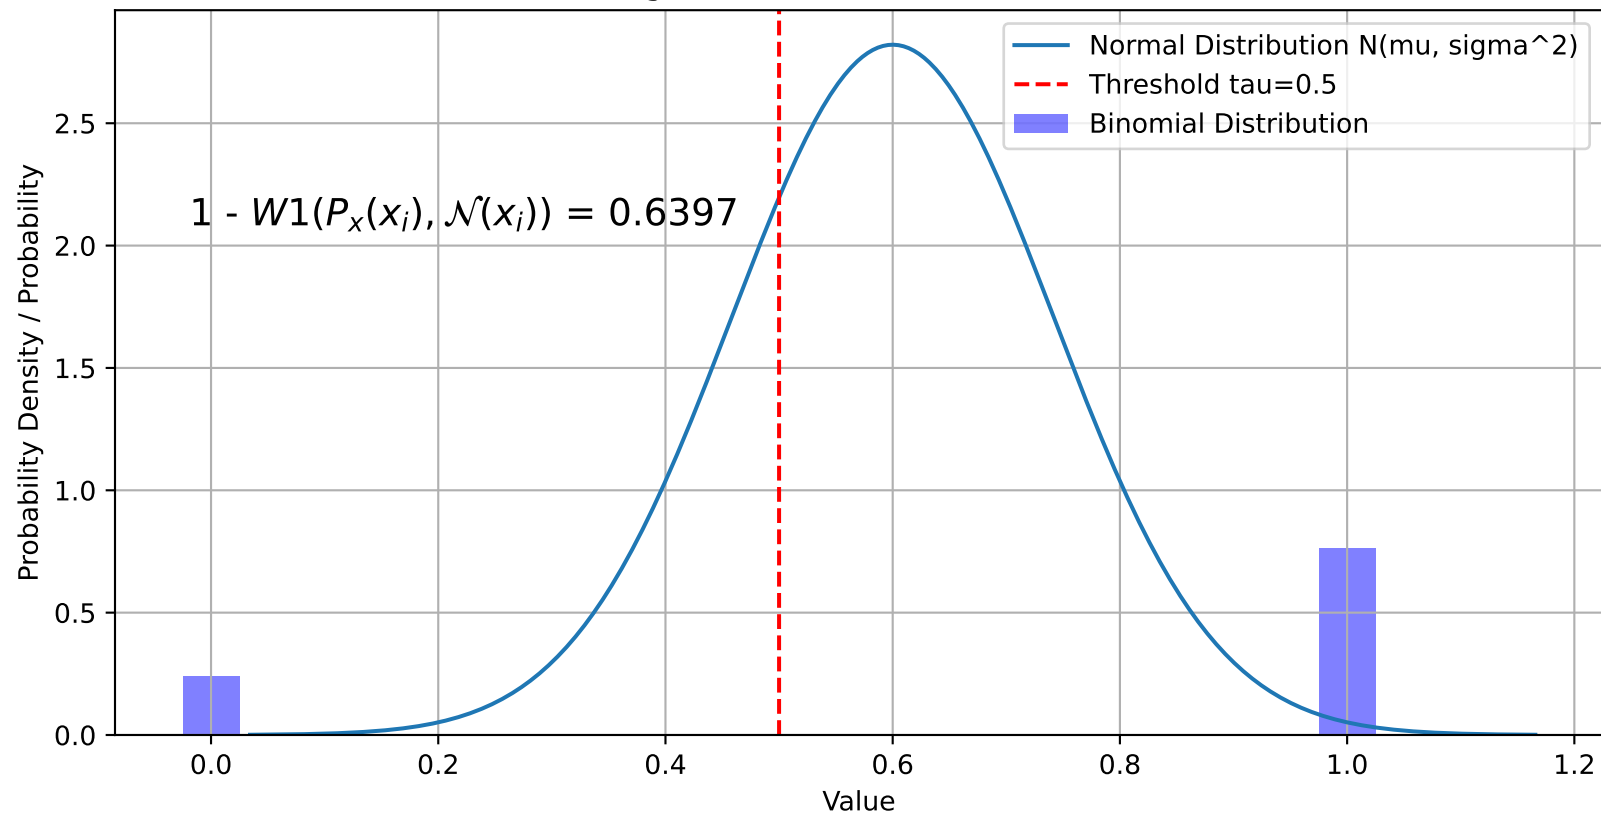

Supplement: supplementary_material [file attachment]

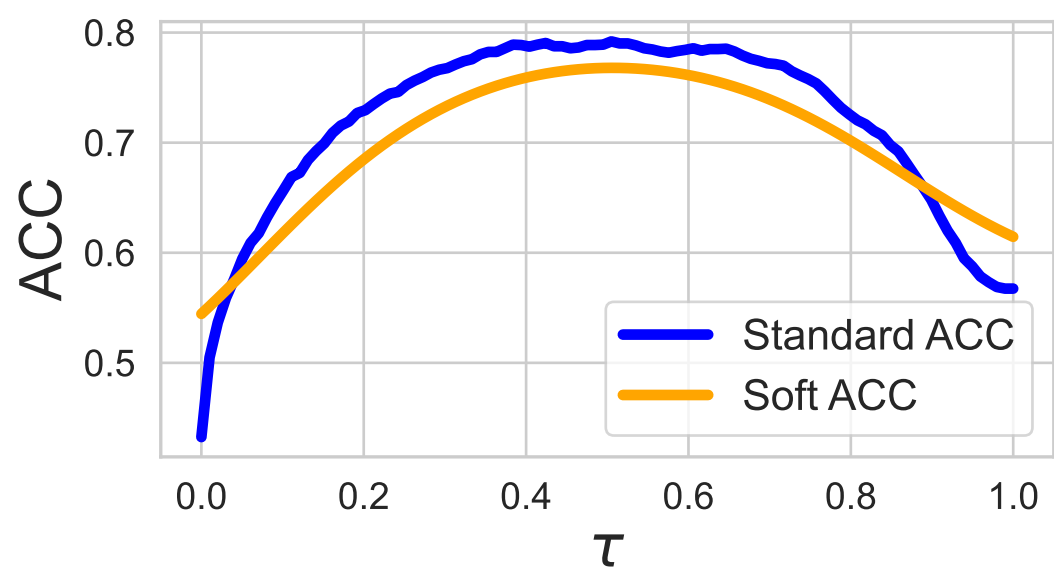

Supplement: supplementary_material [file attachment]

Standard Deviation of Uncertainty Across max\_depth

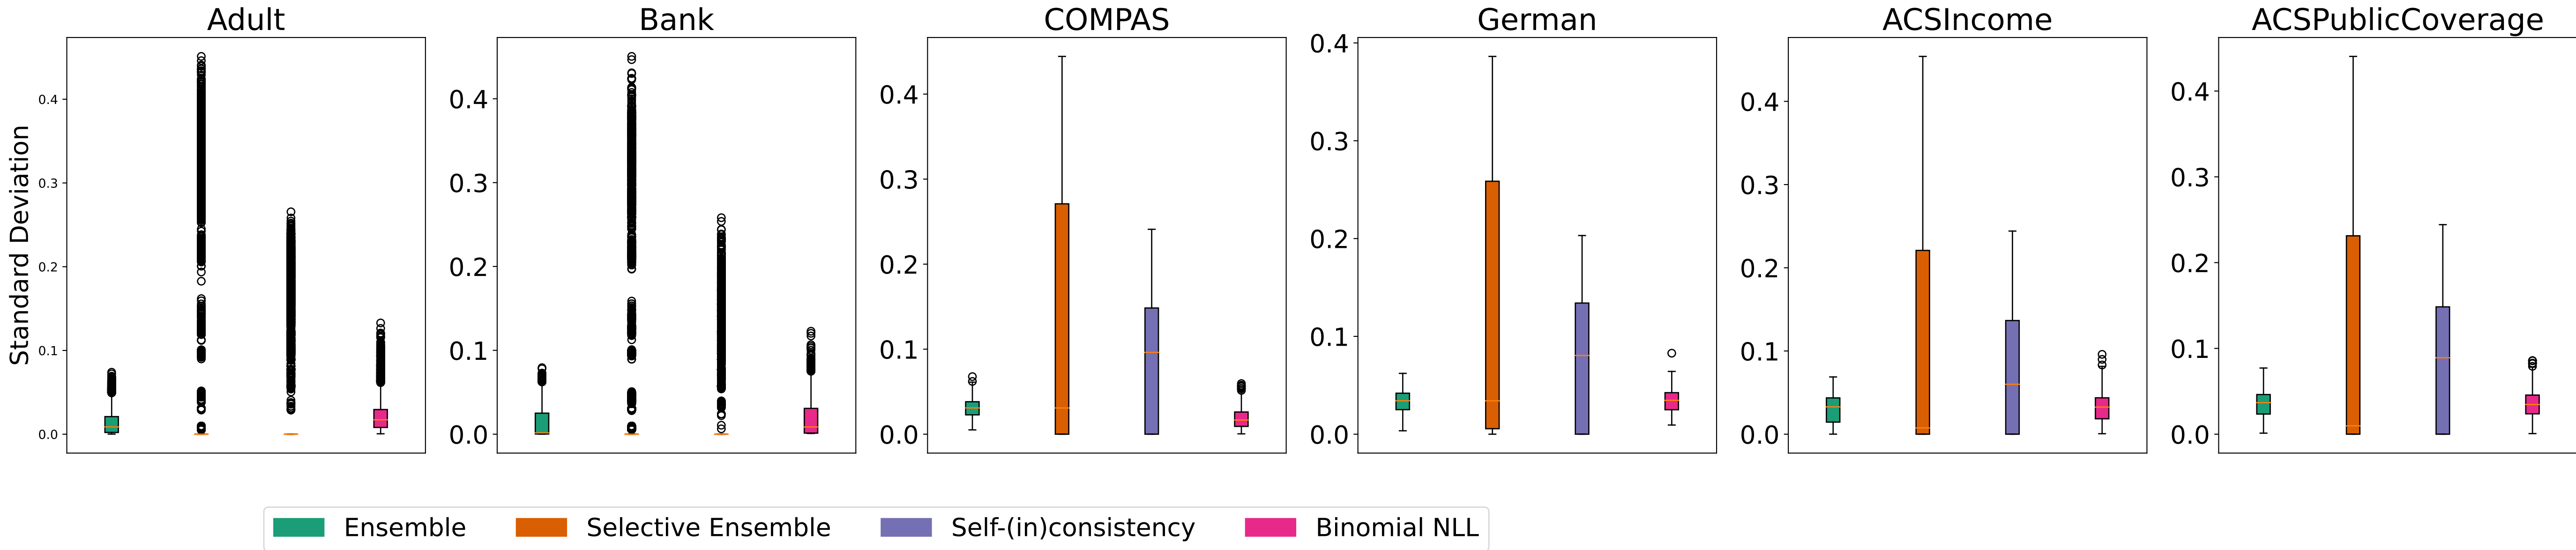

Supplement: supplementary_material [file attachment]

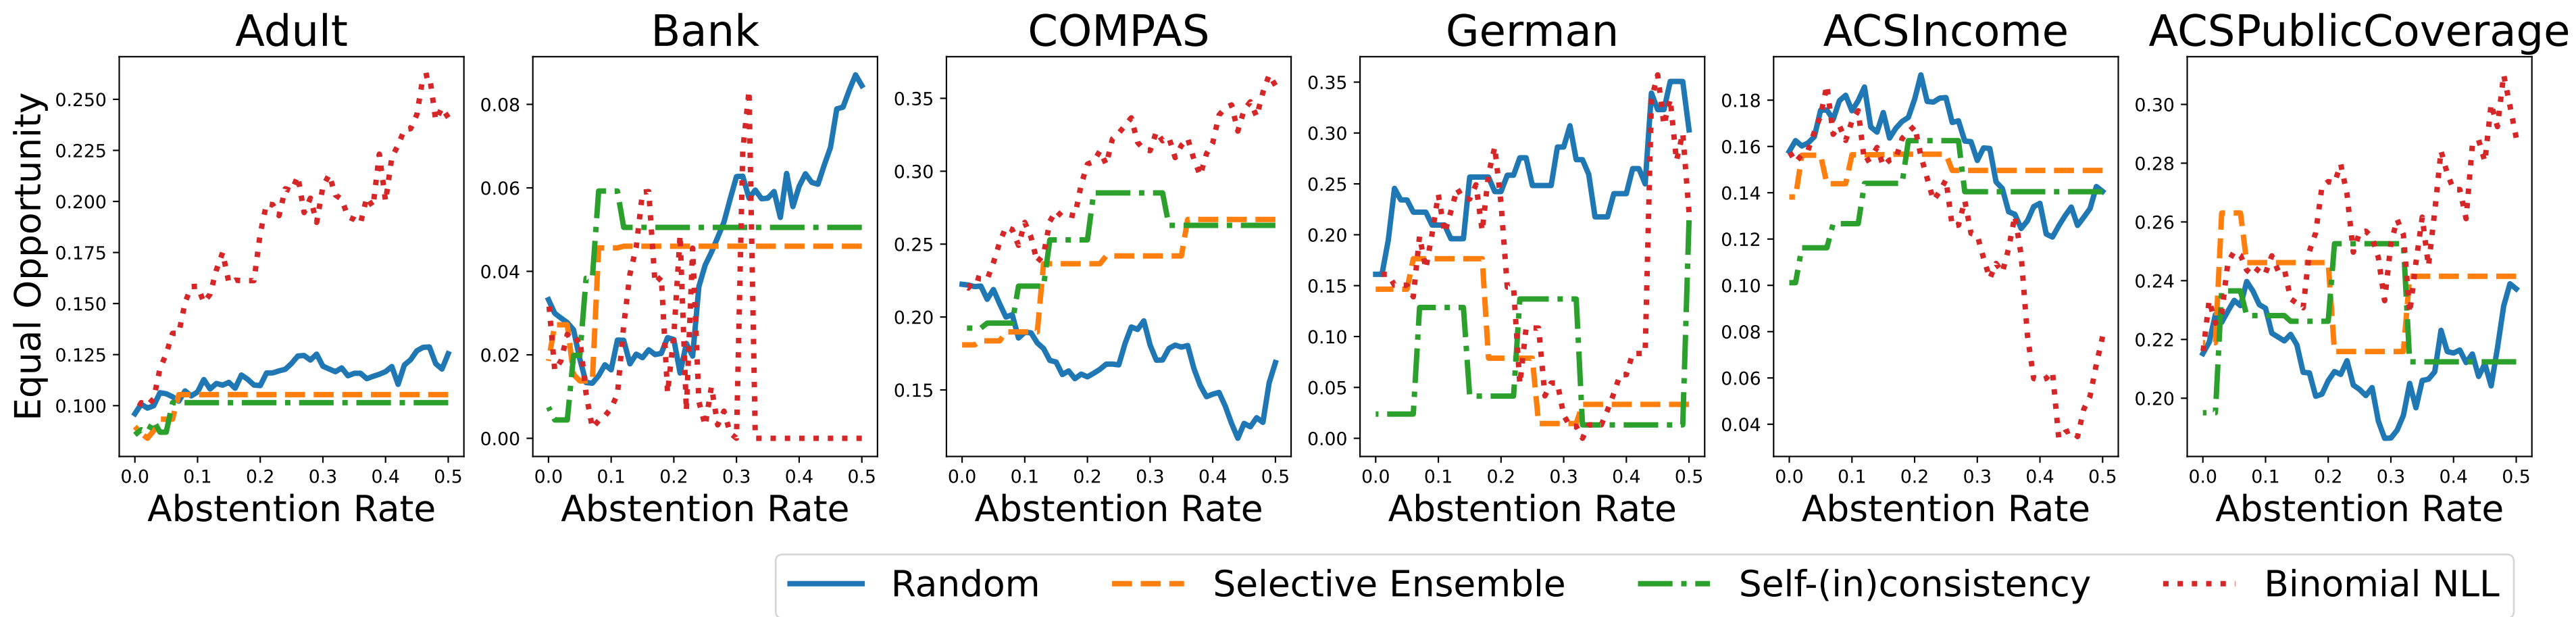

Supplement: supplementary_material [file attachment]

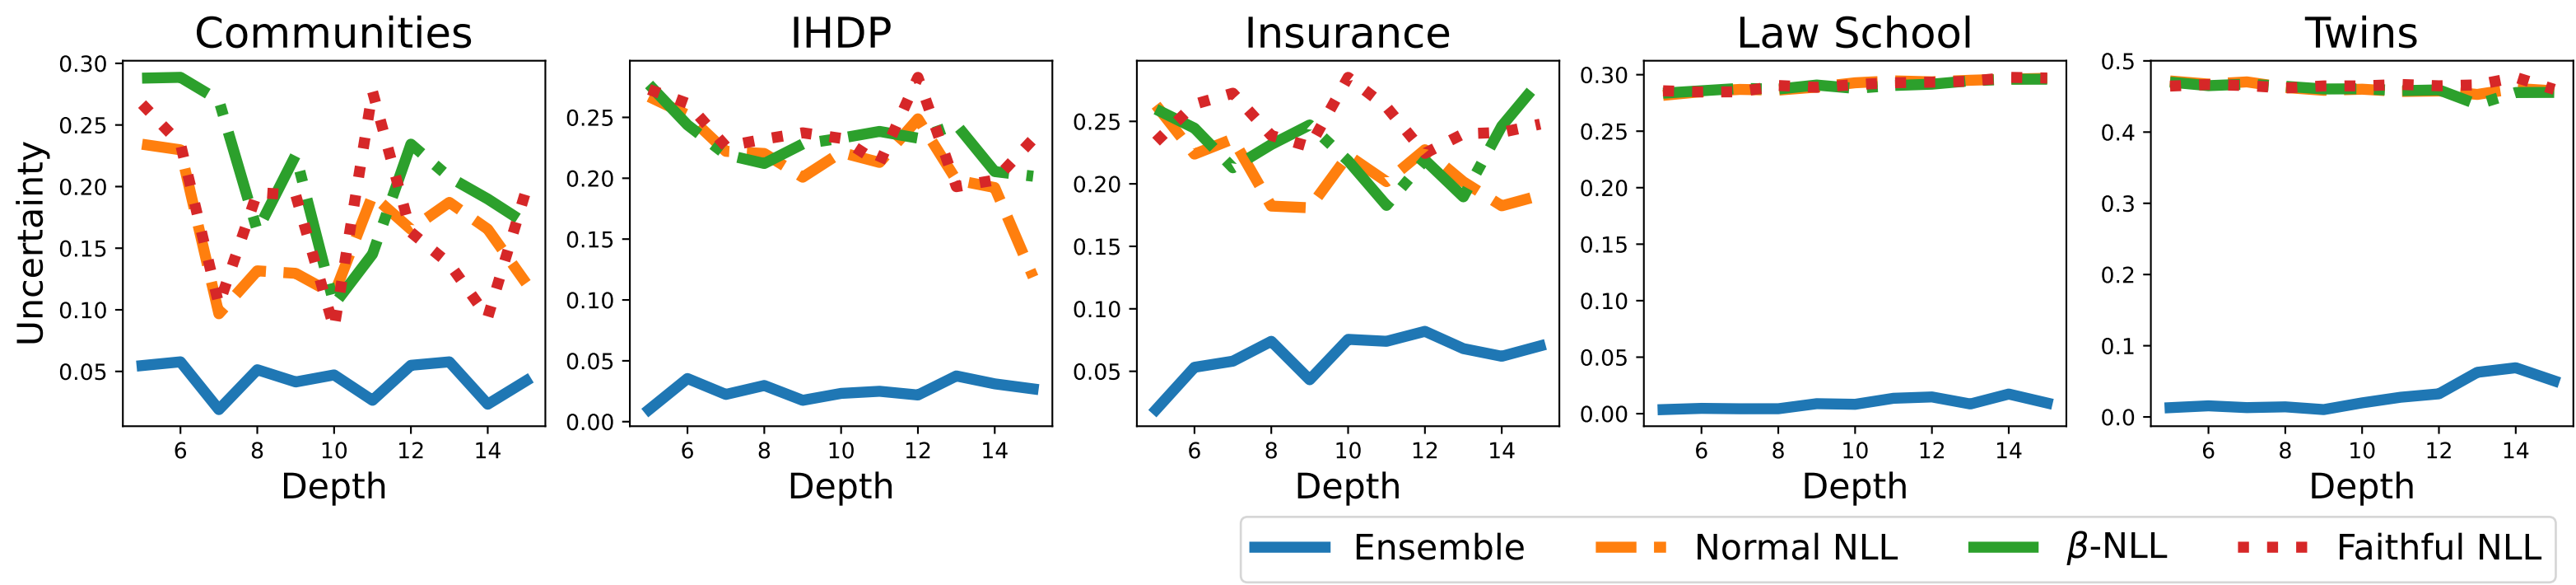

Supplement: supplementary_material [file attachment]

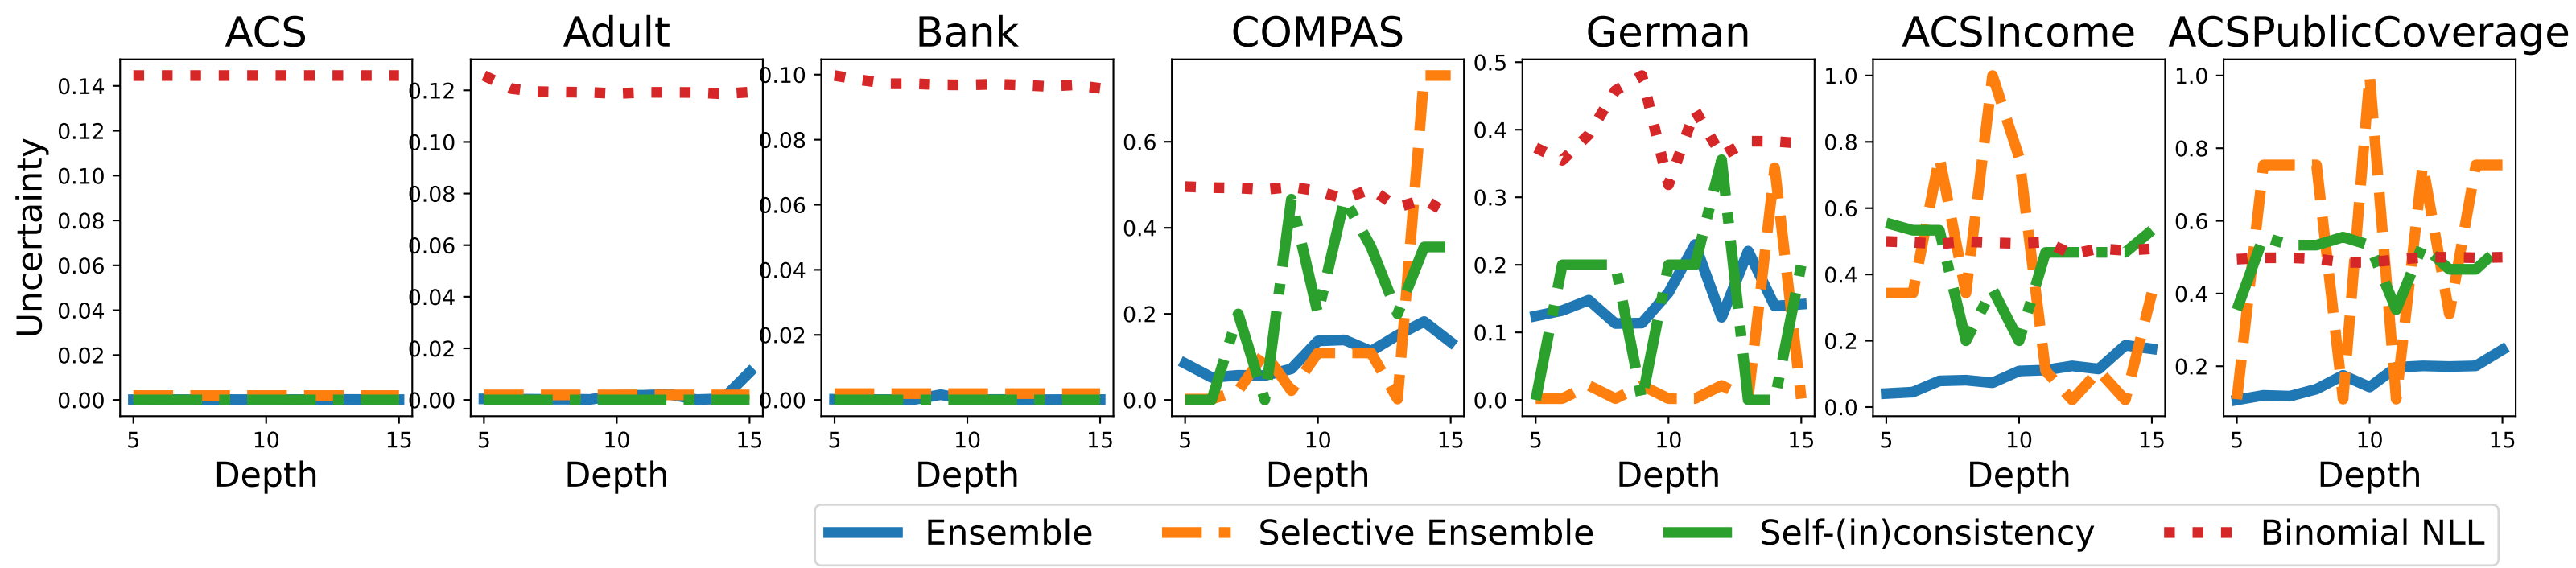

Supplement: supplementary_material [file attachment]

# Calibration for 20 Groups

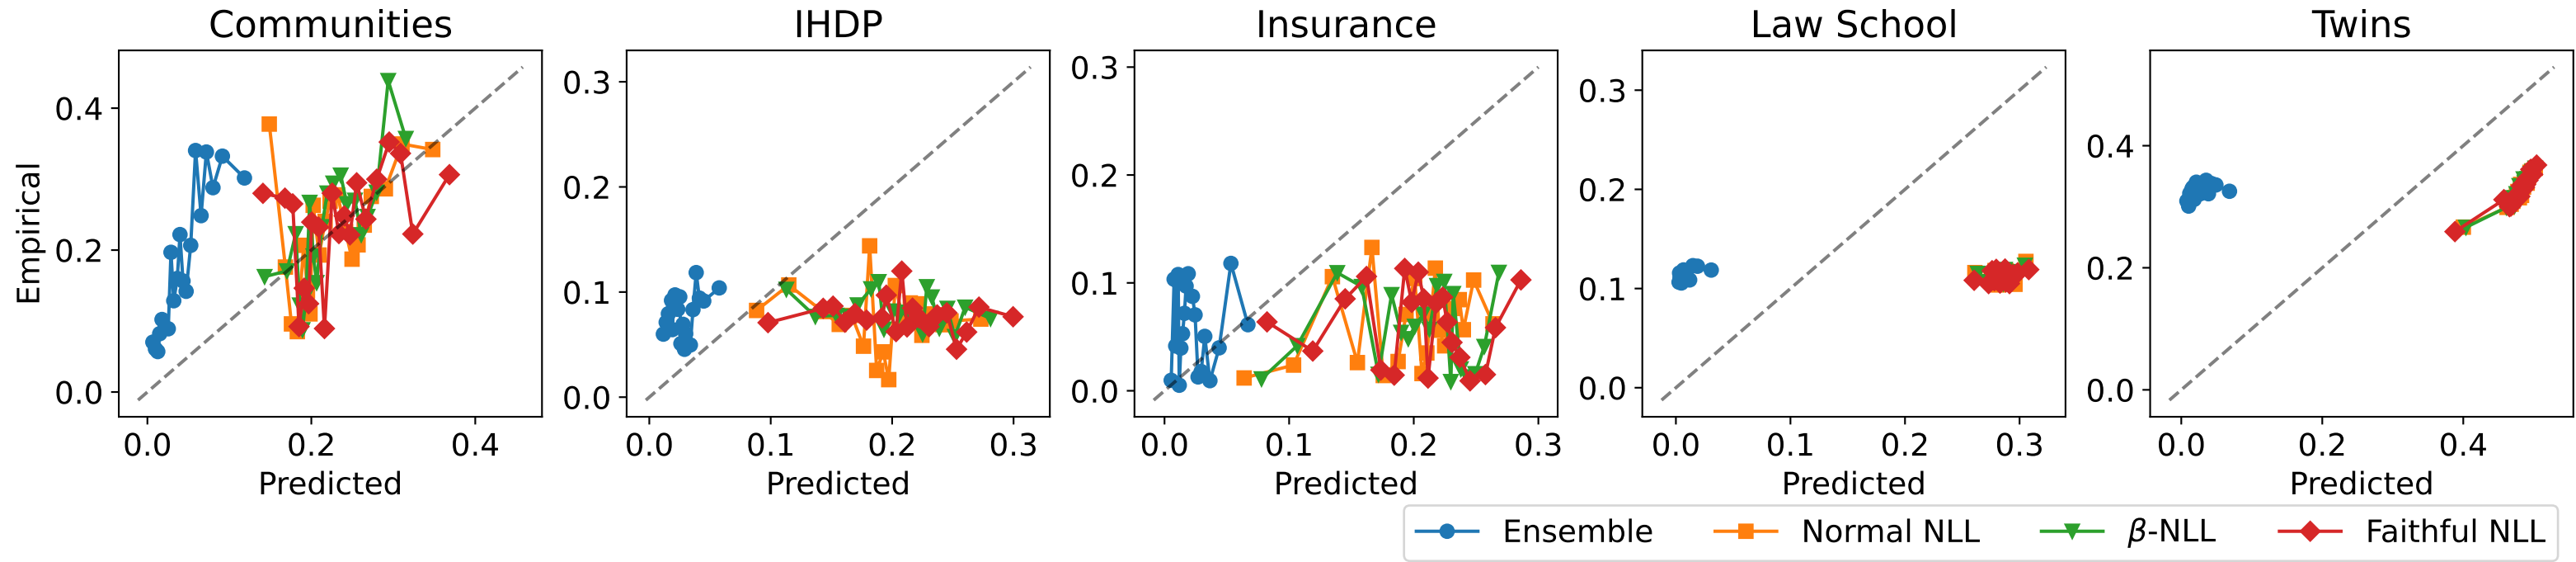

Supplement: supplementary_material [file attachment]

PPV

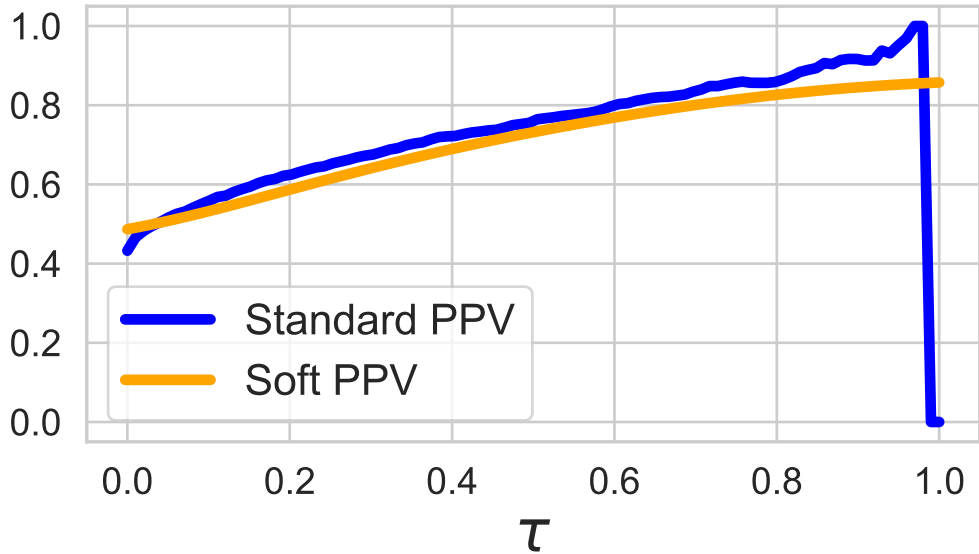

Supplement: supplementary_material [file attachment]

# Calibration for 25 Groups

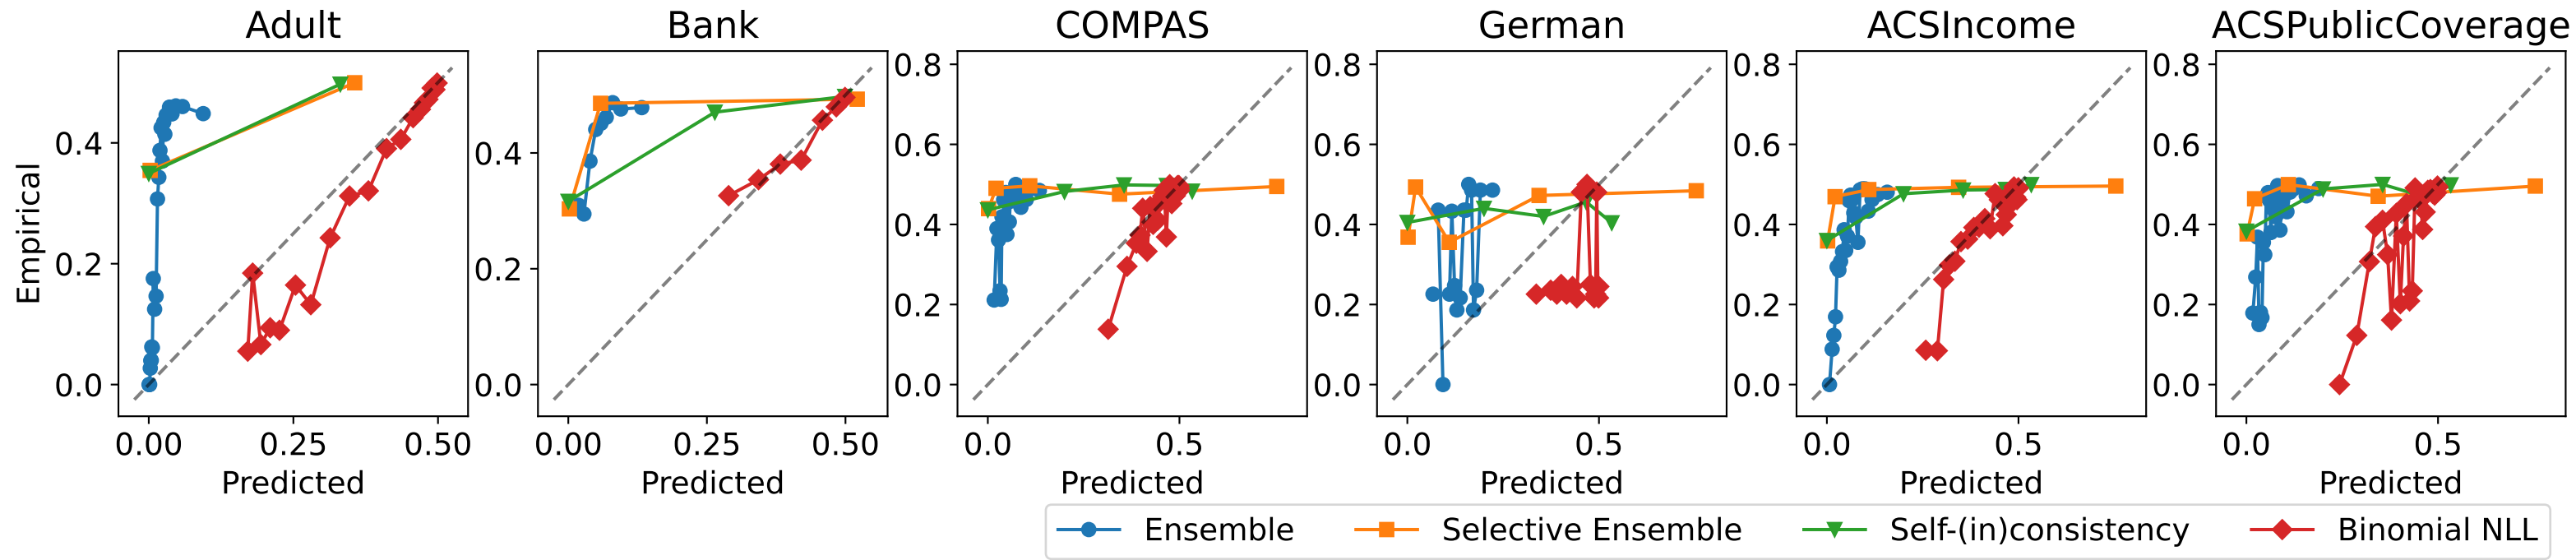

Supplement: supplementary_material [file attachment]

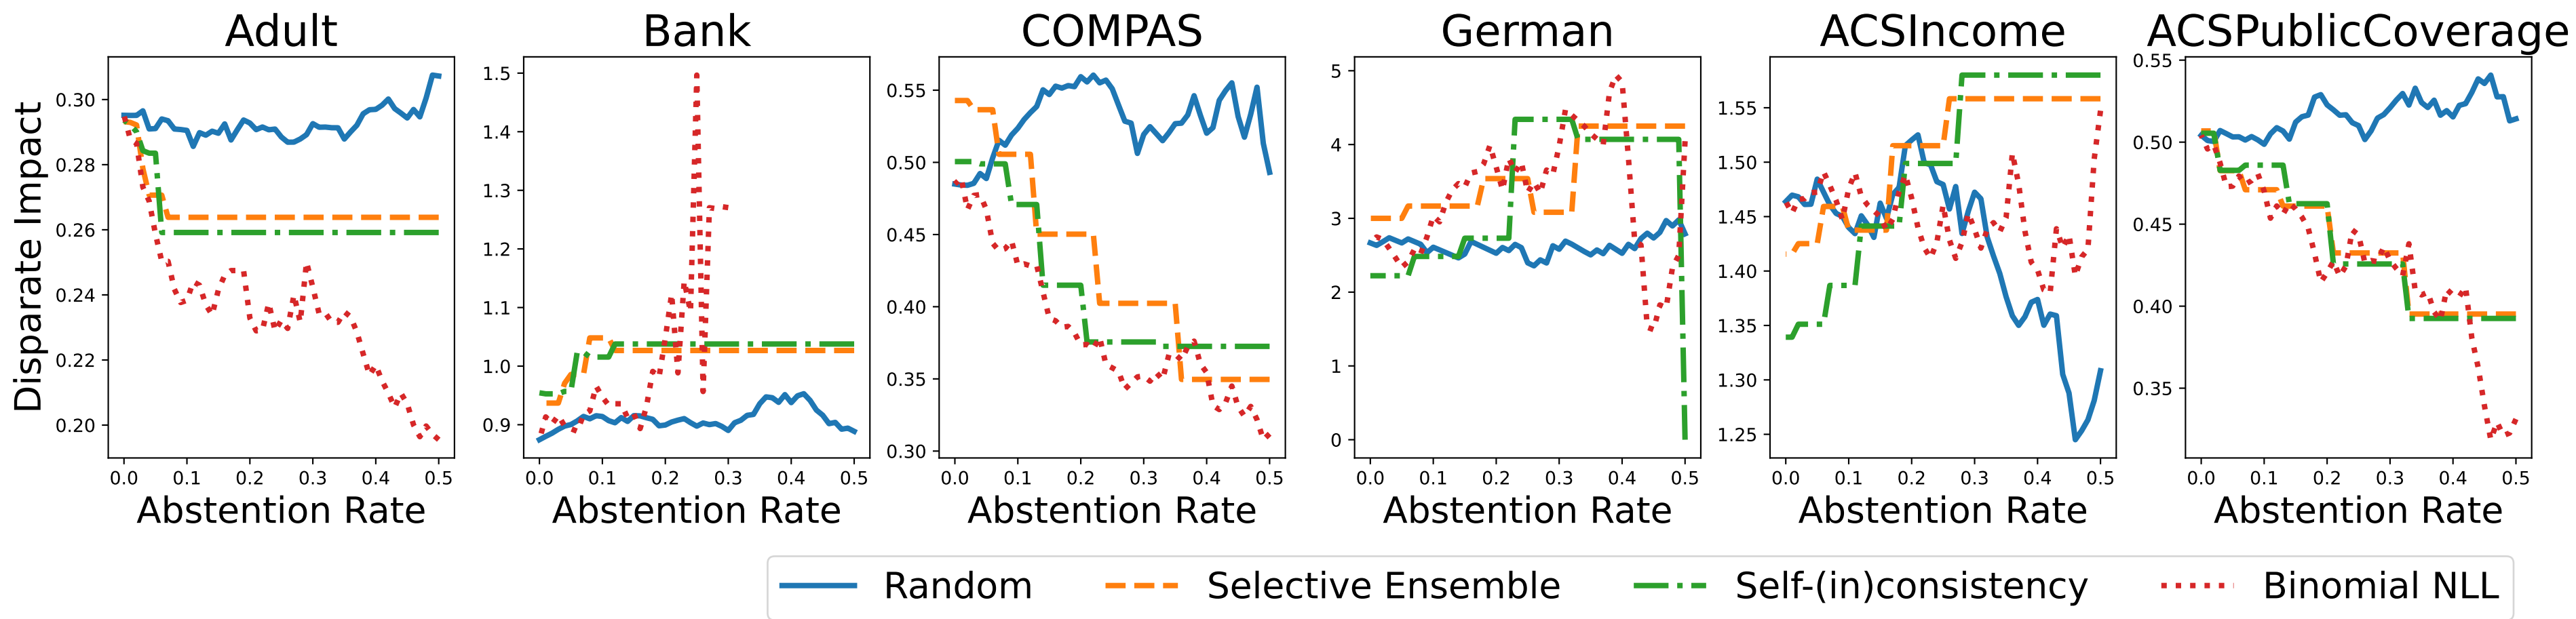

Supplement: supplementary_material [file attachment]

# Feature Distributions in Overall and Selected Observations

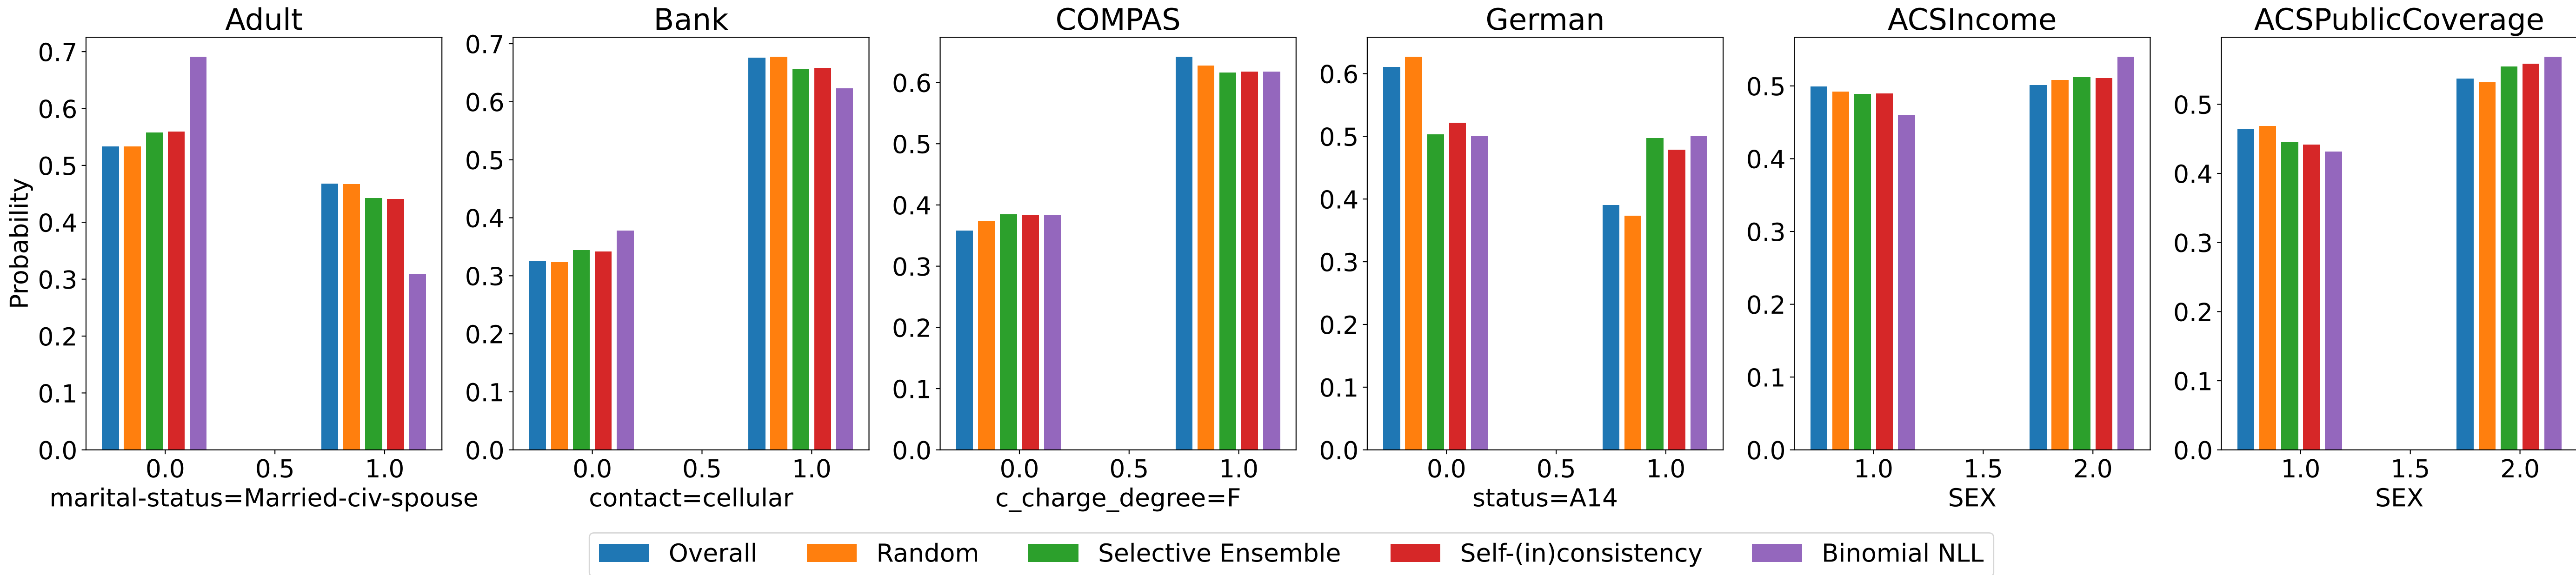

Supplement: supplementary_material [file attachment]

# Calibration for 5 Groups

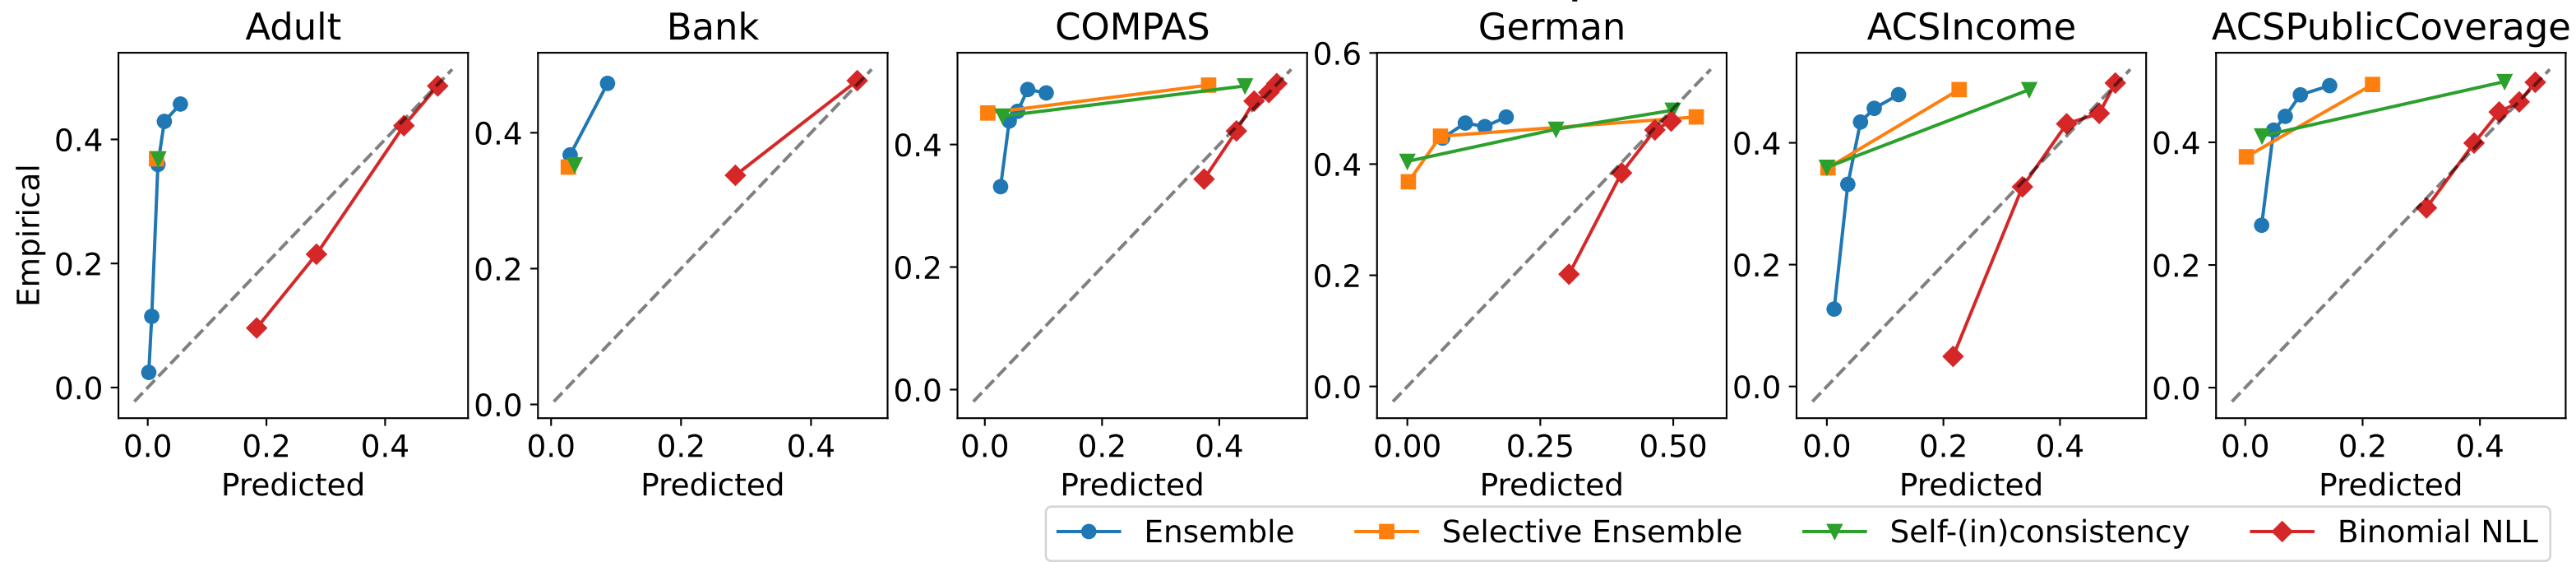

Supplement: supplementary_material [file attachment]

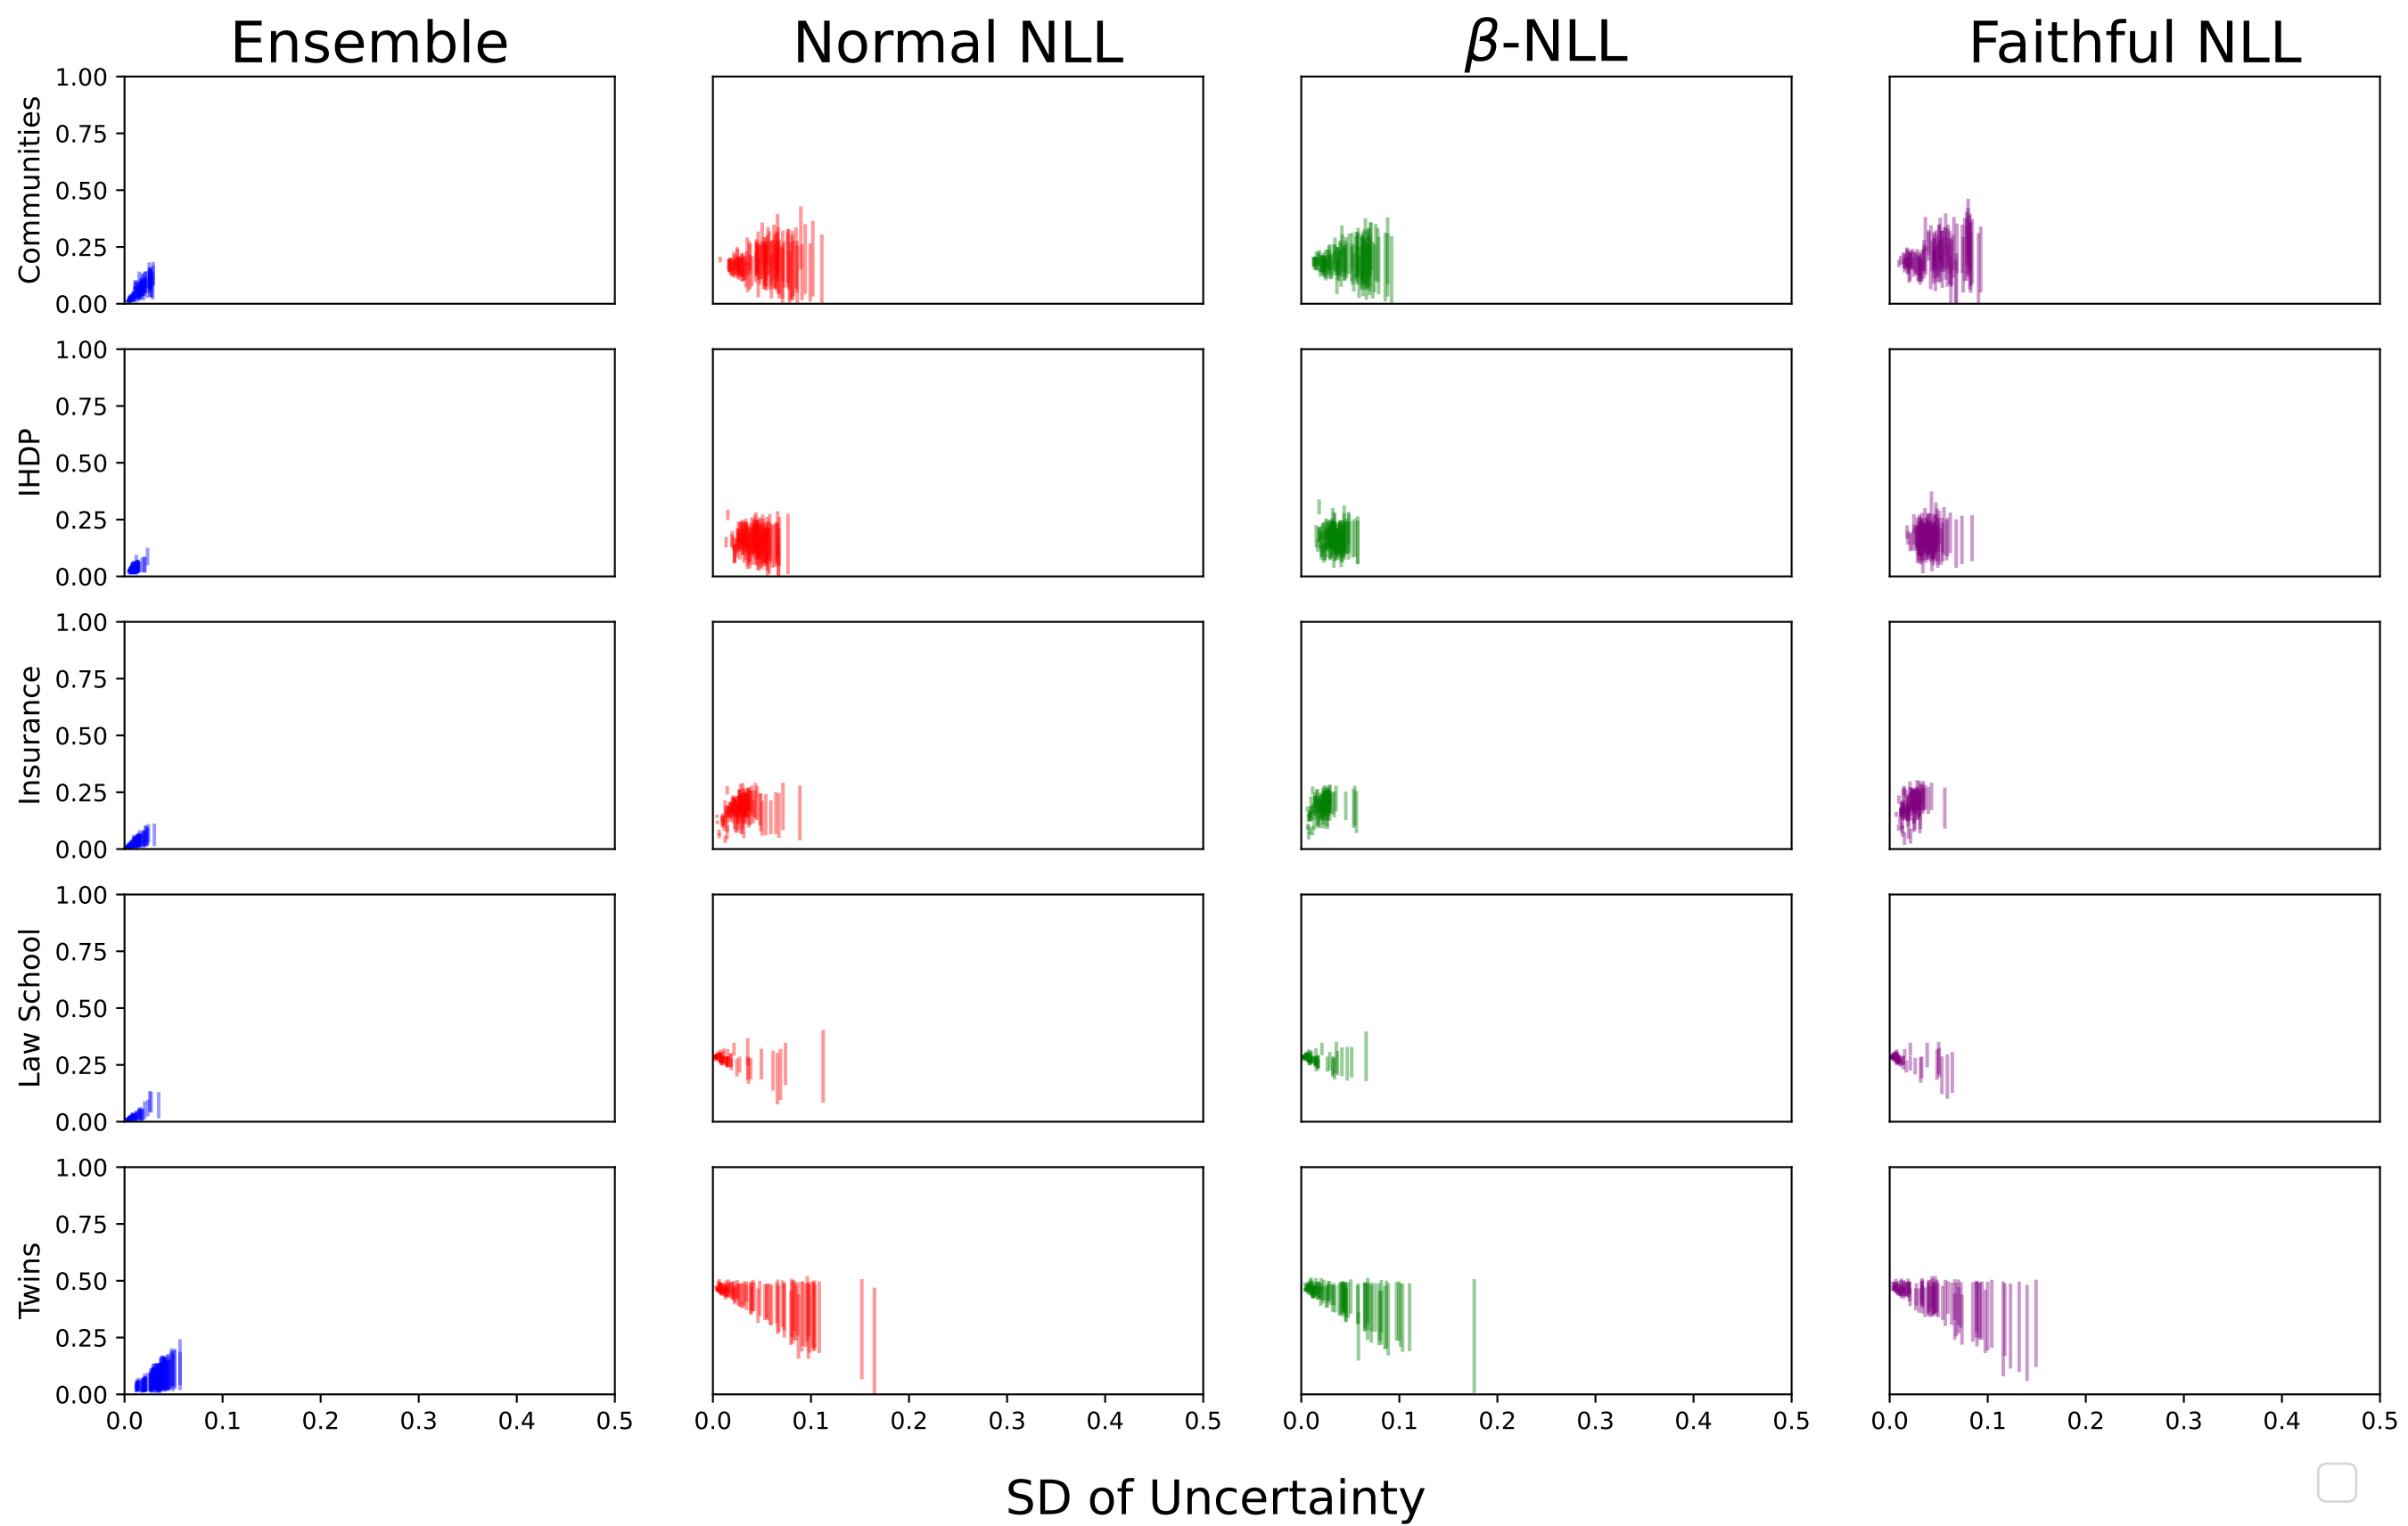

Supplement: supplementary_material [file attachment]

# Calibration for 5 Groups

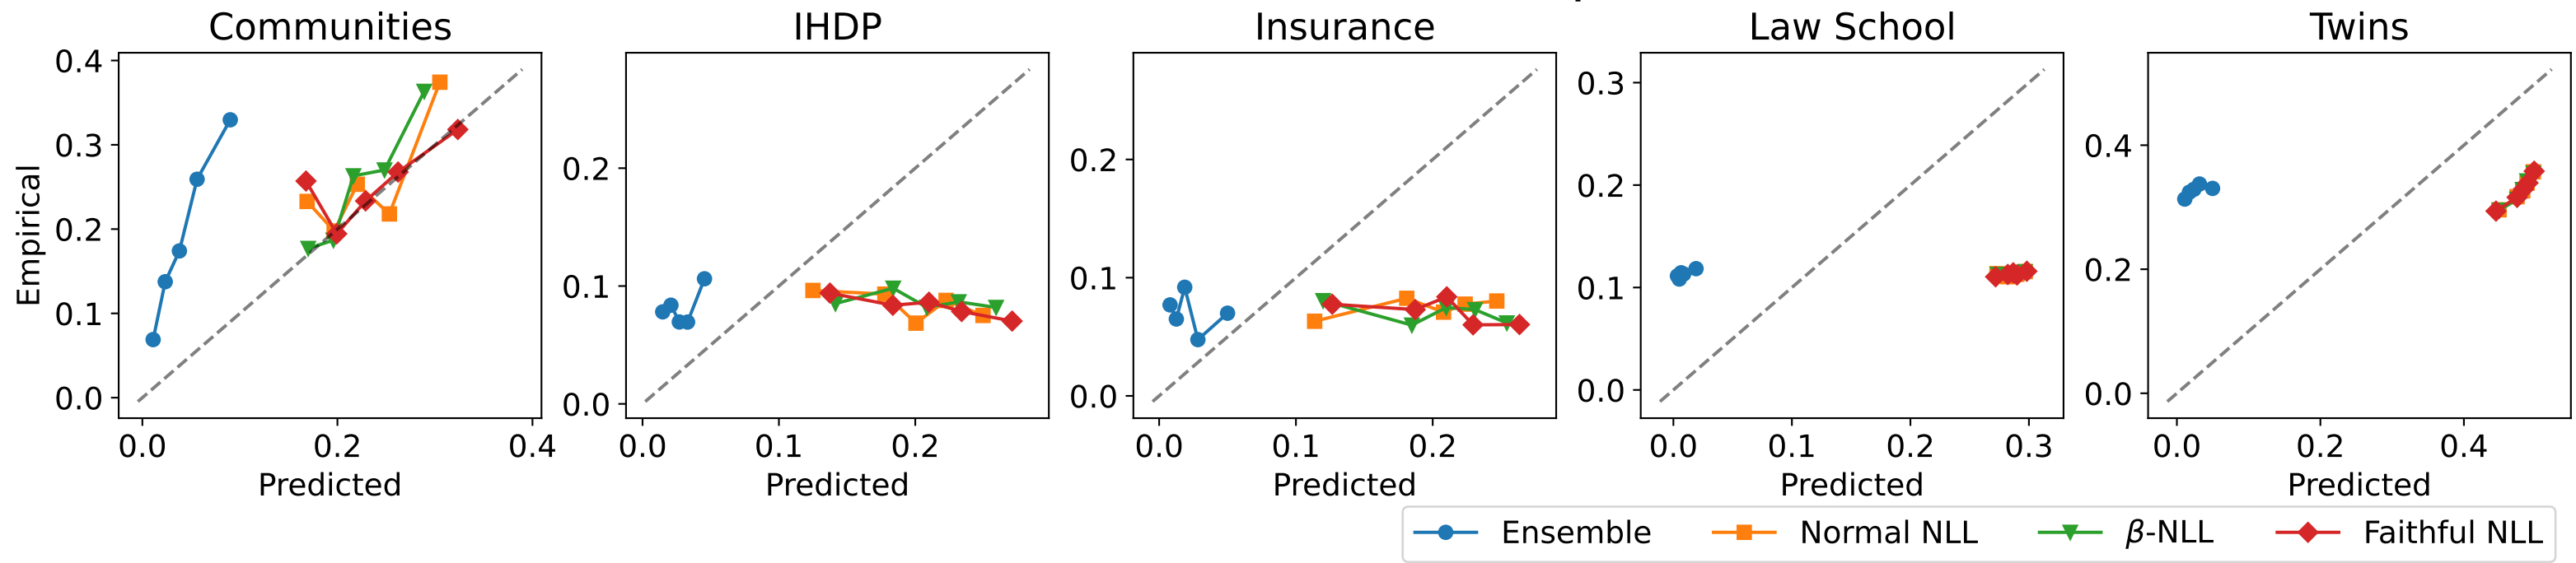

Supplement: supplementary_material [file attachment]

# Calibration for 30 Groups

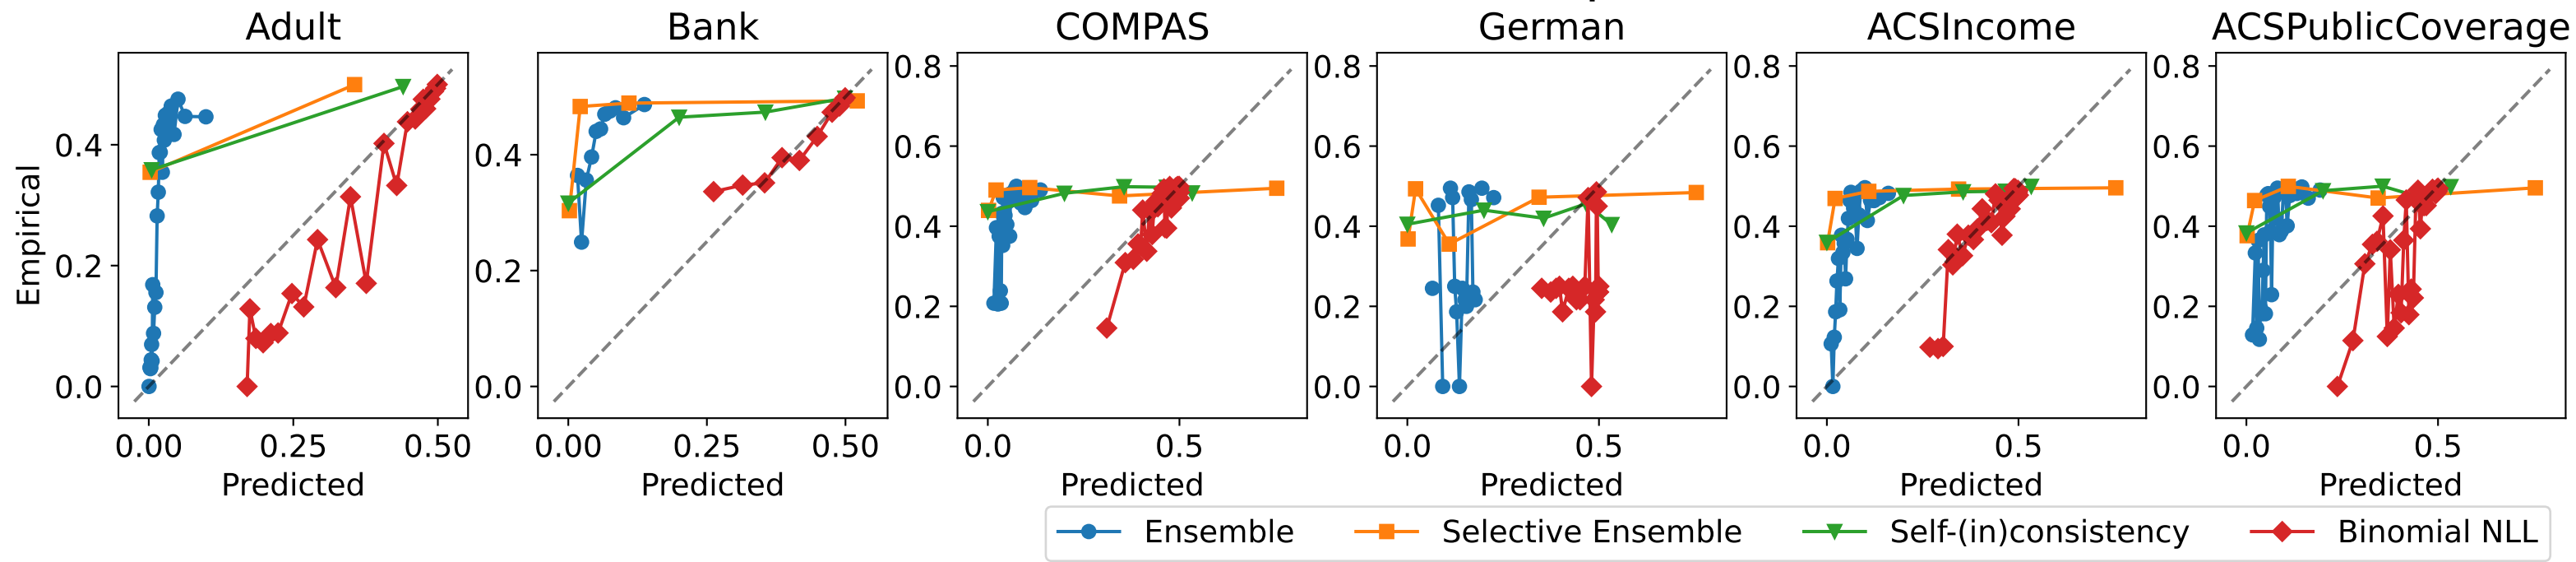

Supplement: supplementary_material [file attachment]

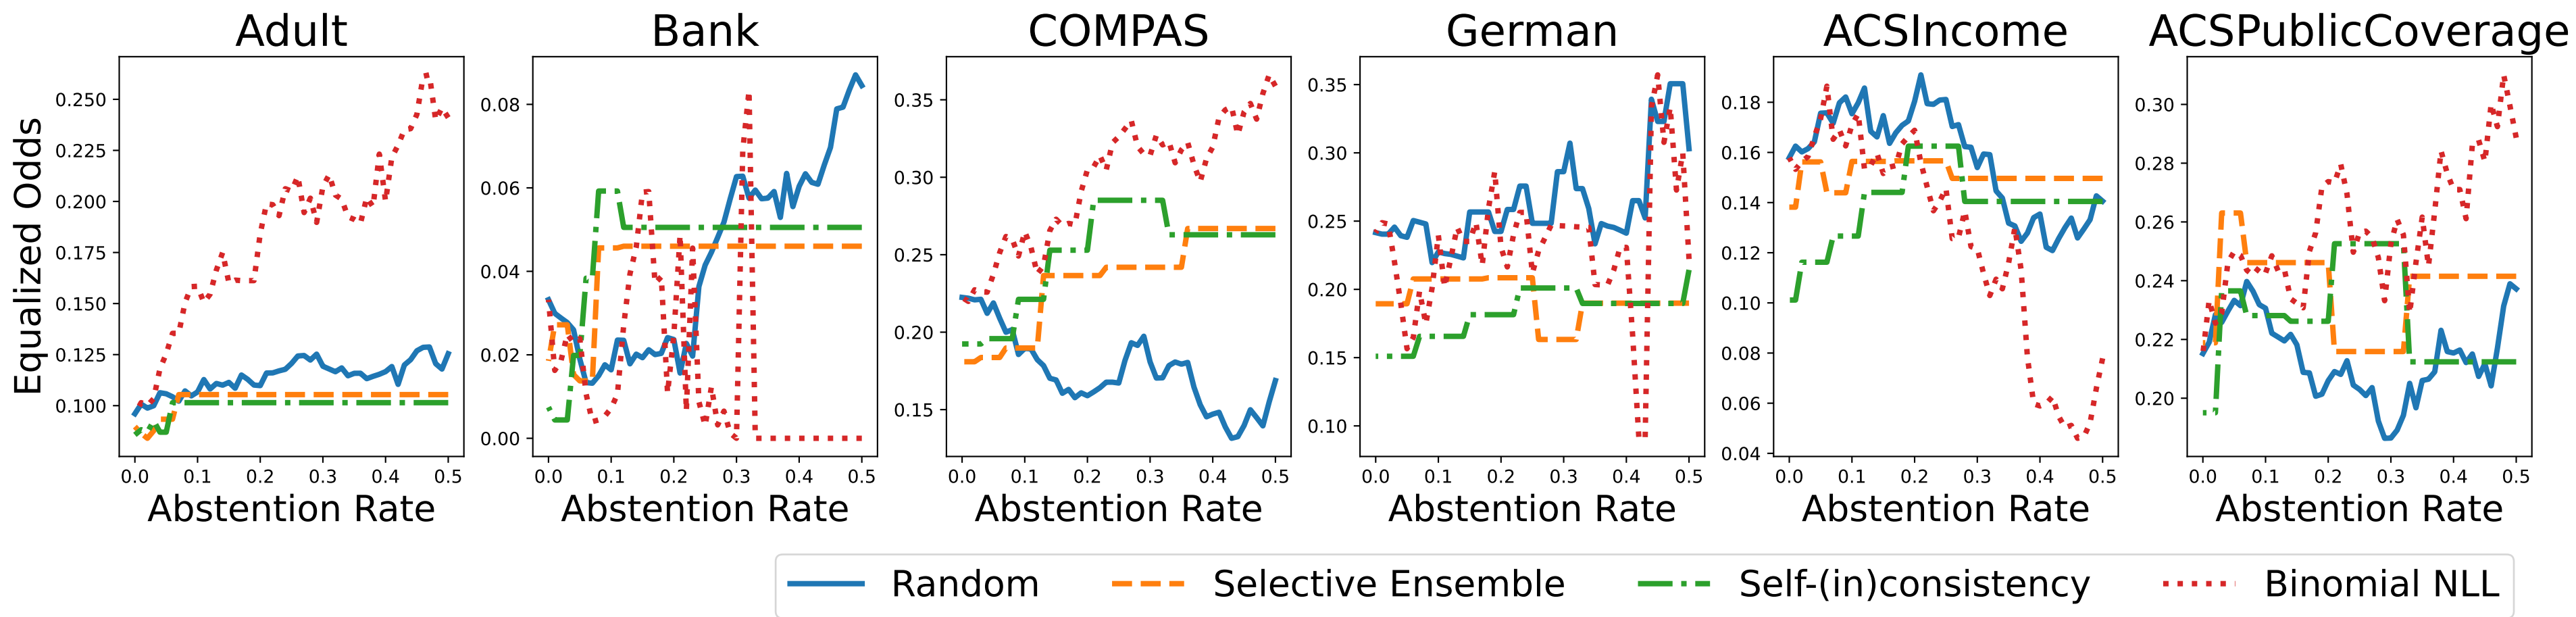

Supplement: supplementary_material [file attachment]

# Calibration for 15 Groups

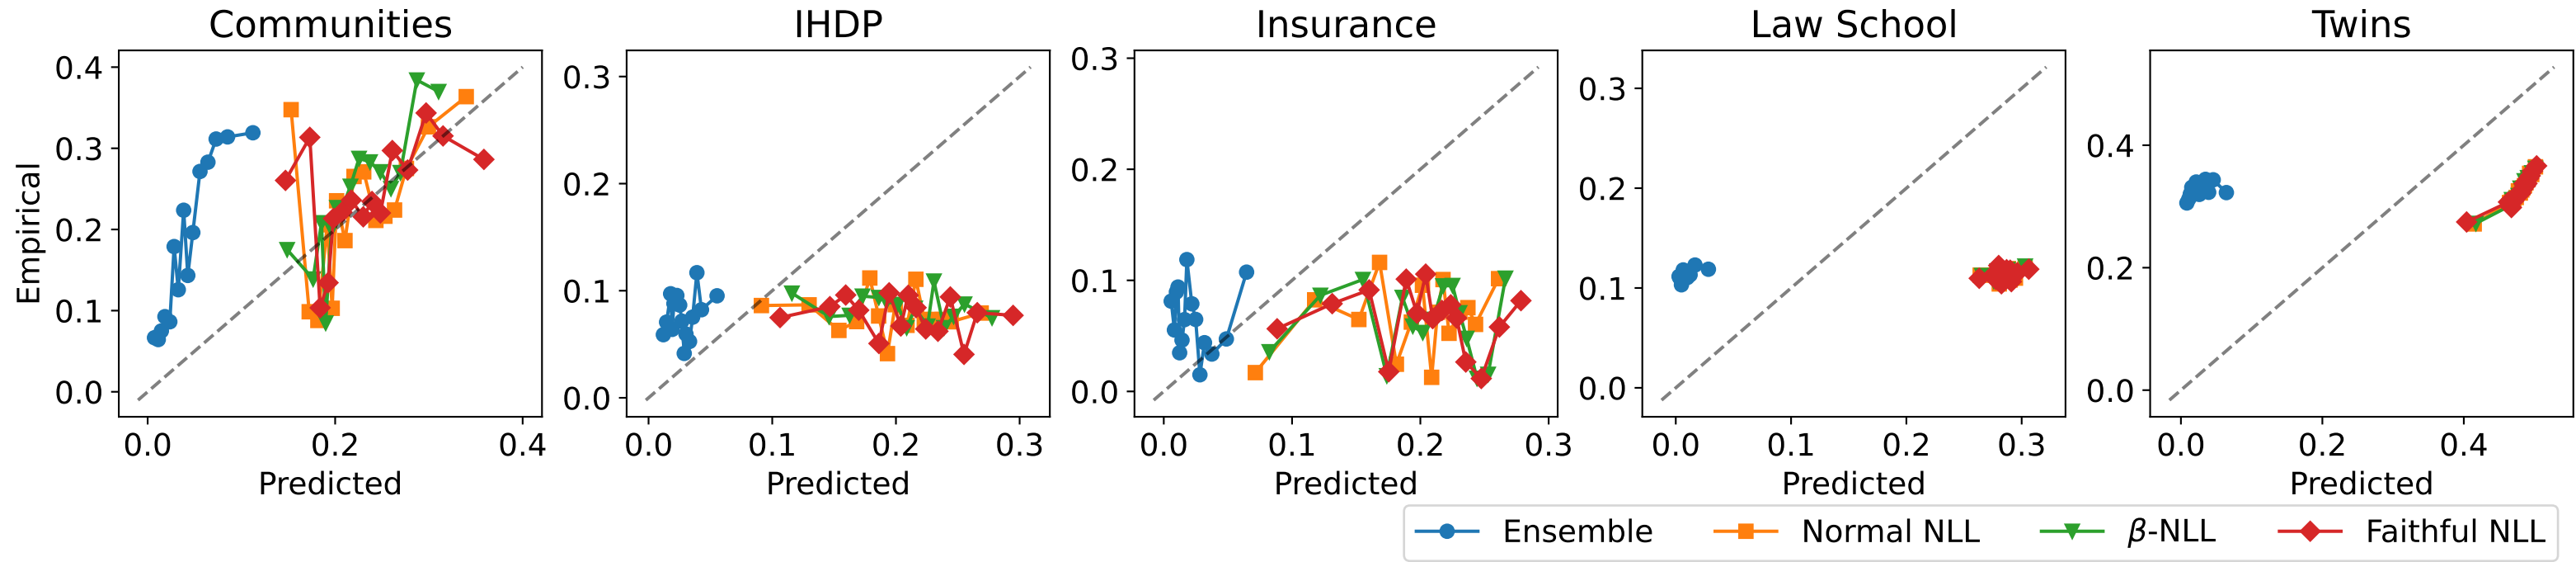

Supplement: supplementary_material [file attachment]

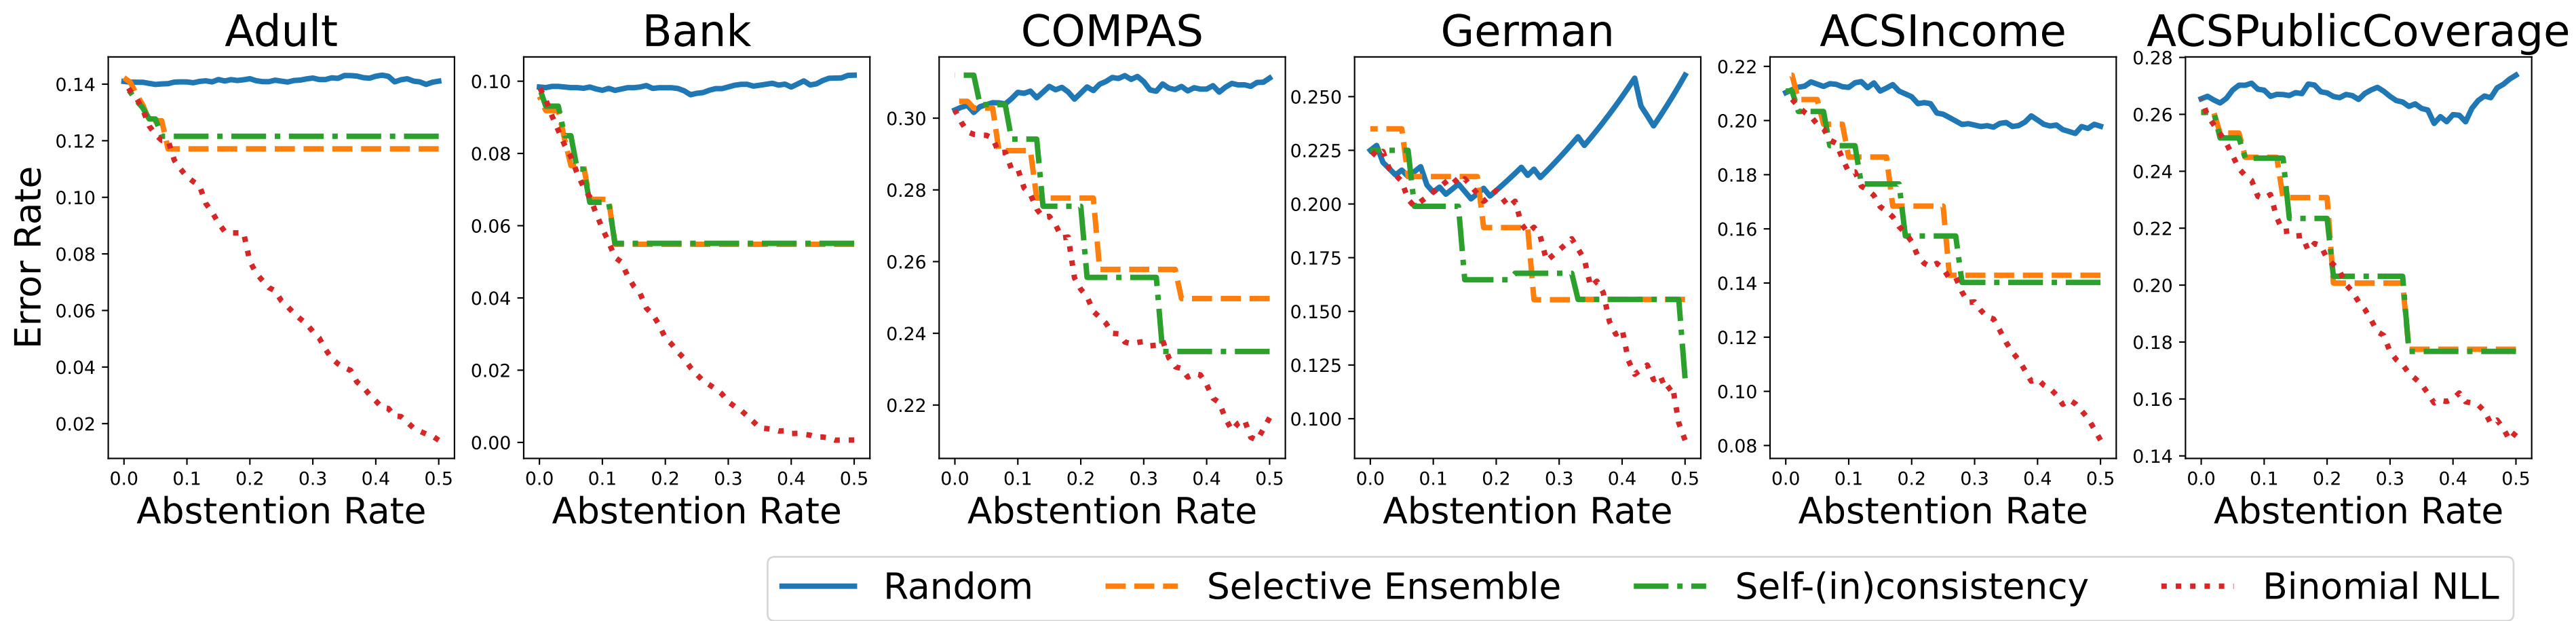

Supplement: supplementary_material [file attachment]

Communities

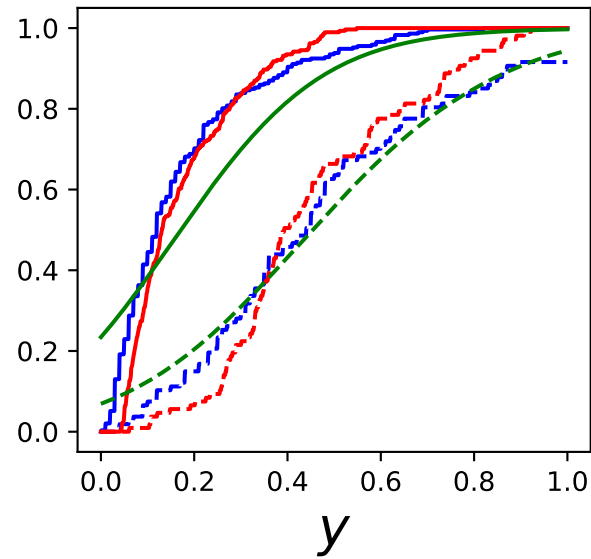

IHDP

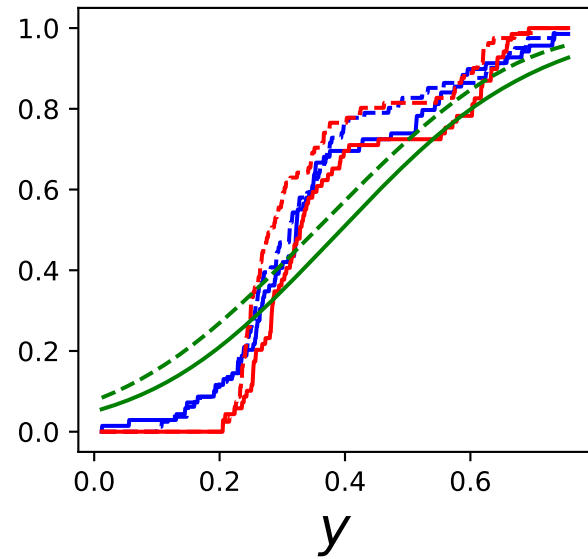

Insurance

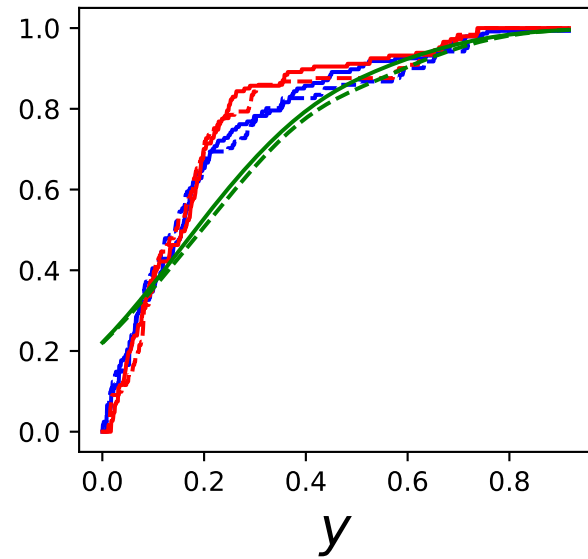

Law School

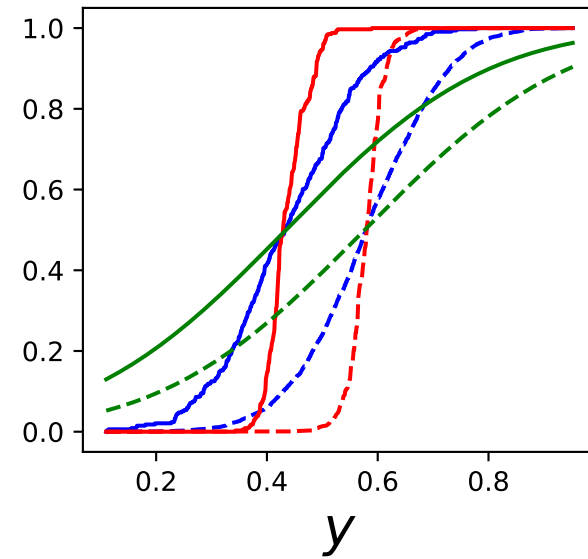

Twins

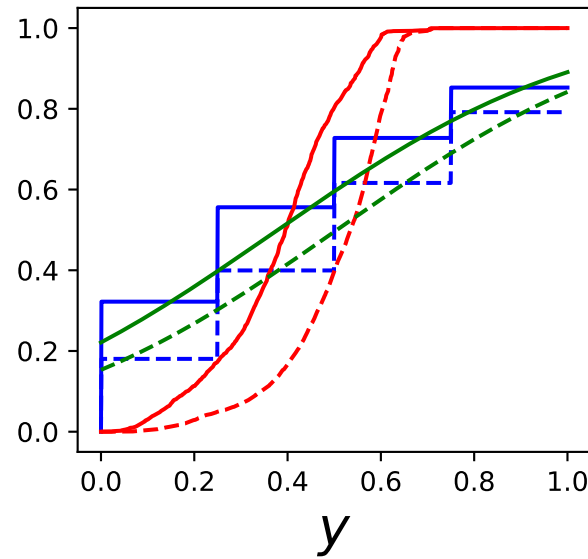

— True — Baseline — Normal NLL

Supplement: supplementary_material [file attachment]

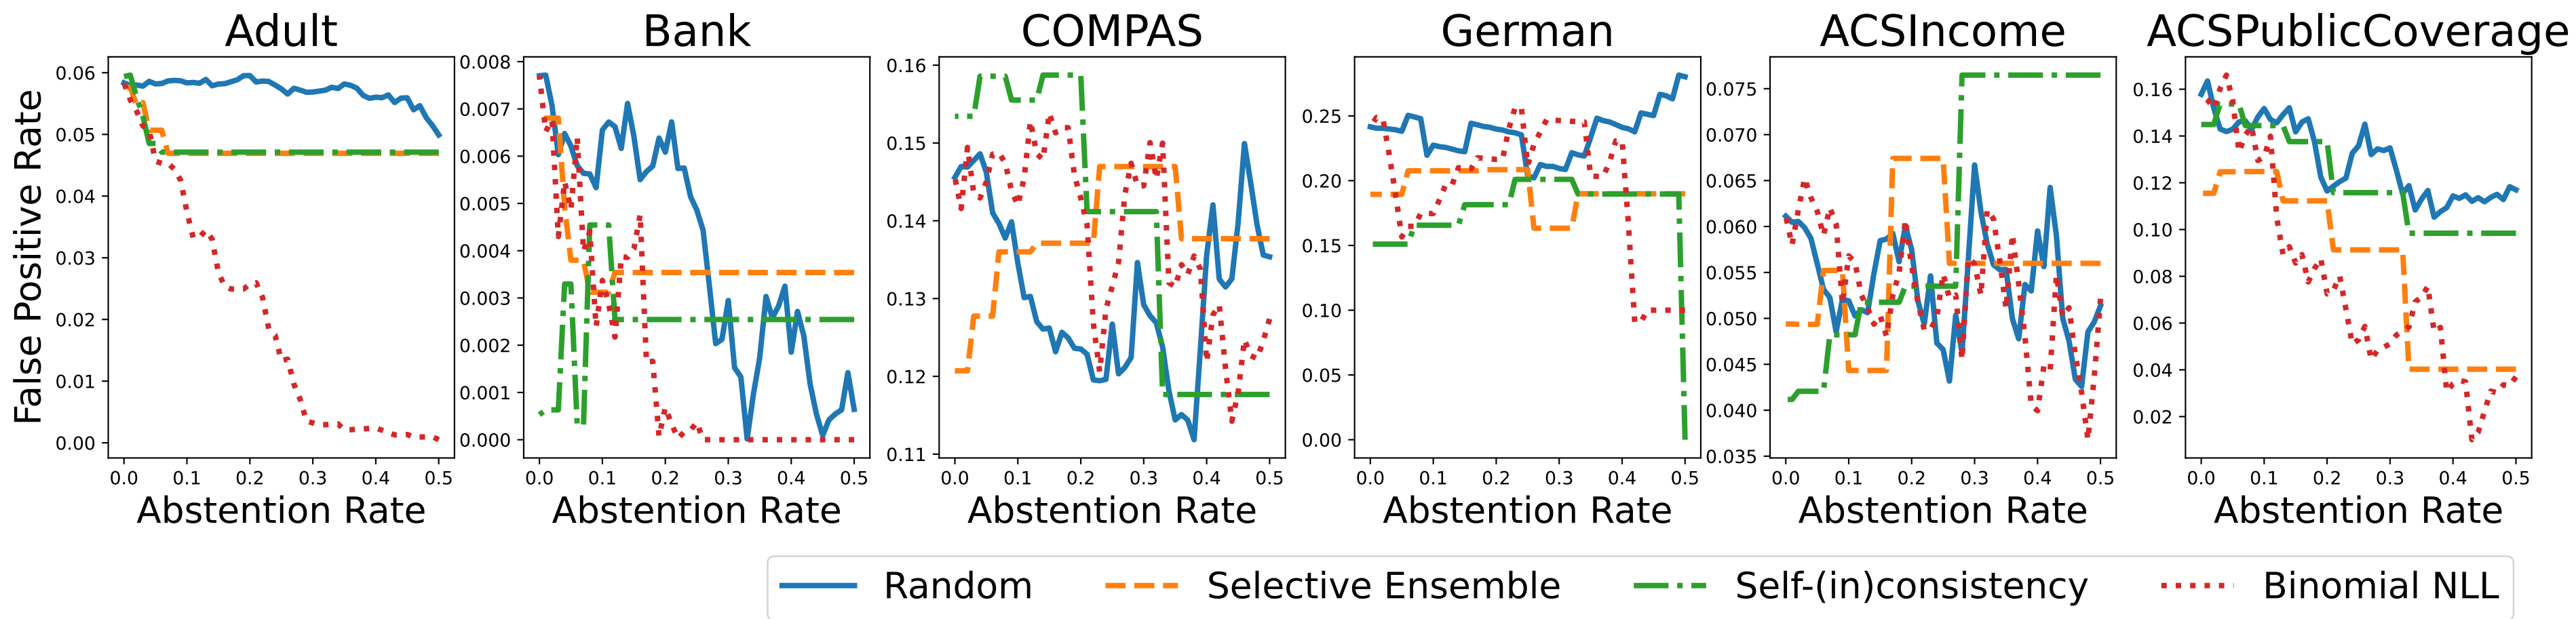

Supplement: supplementary_material [file attachment]

# Calibration for 10 Groups

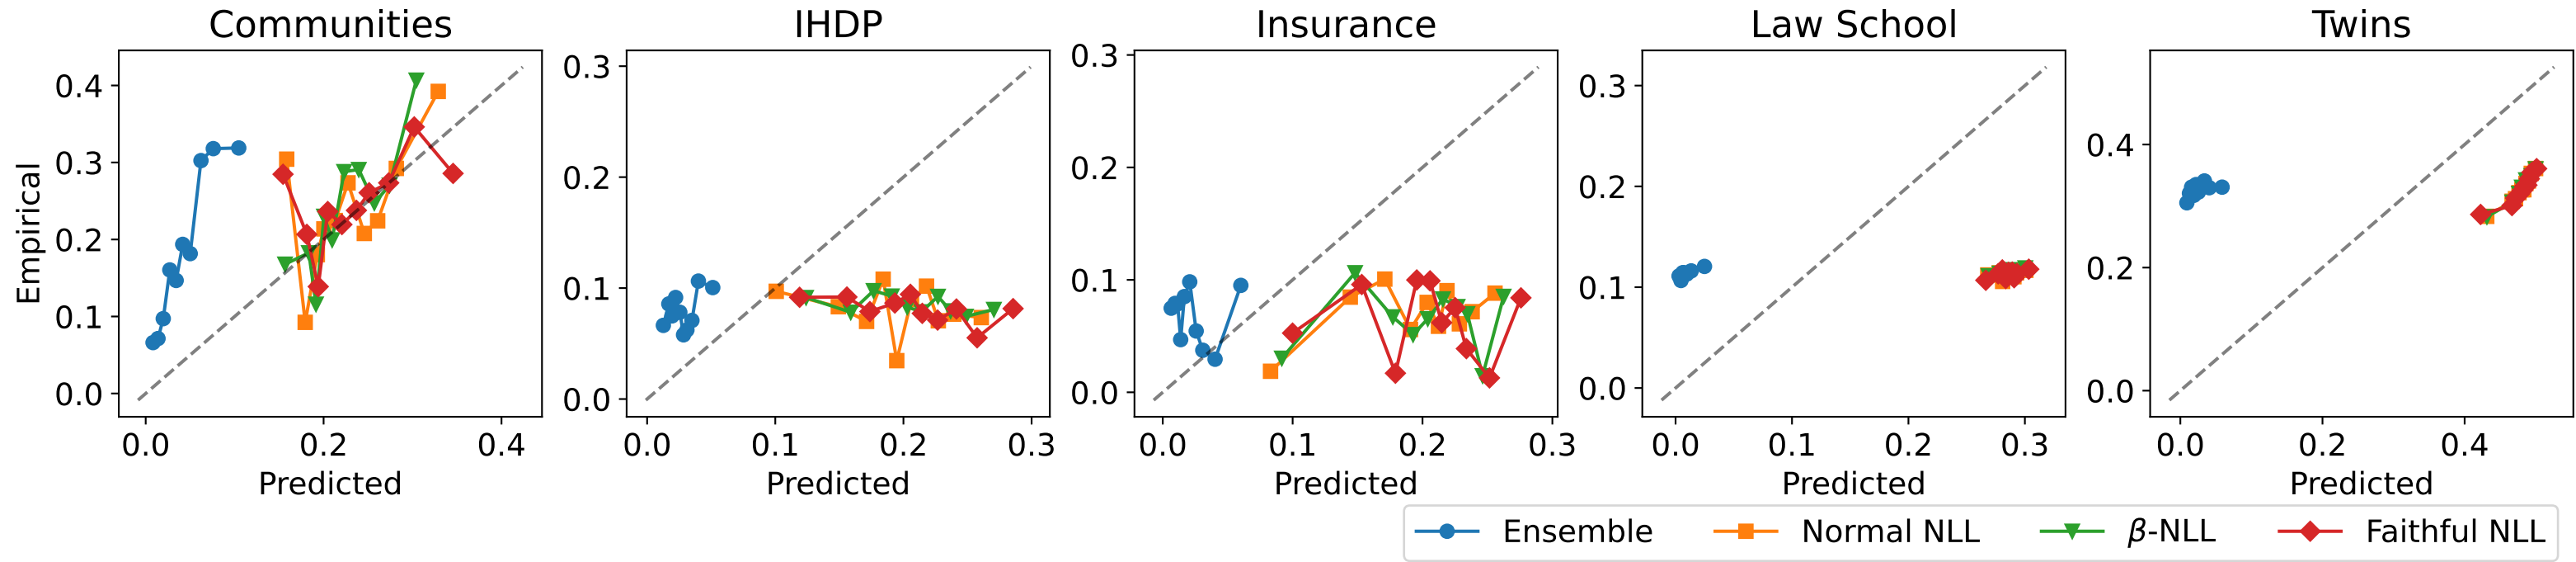

Supplement: supplementary_material [file attachment]

# Calibration for 30 Groups

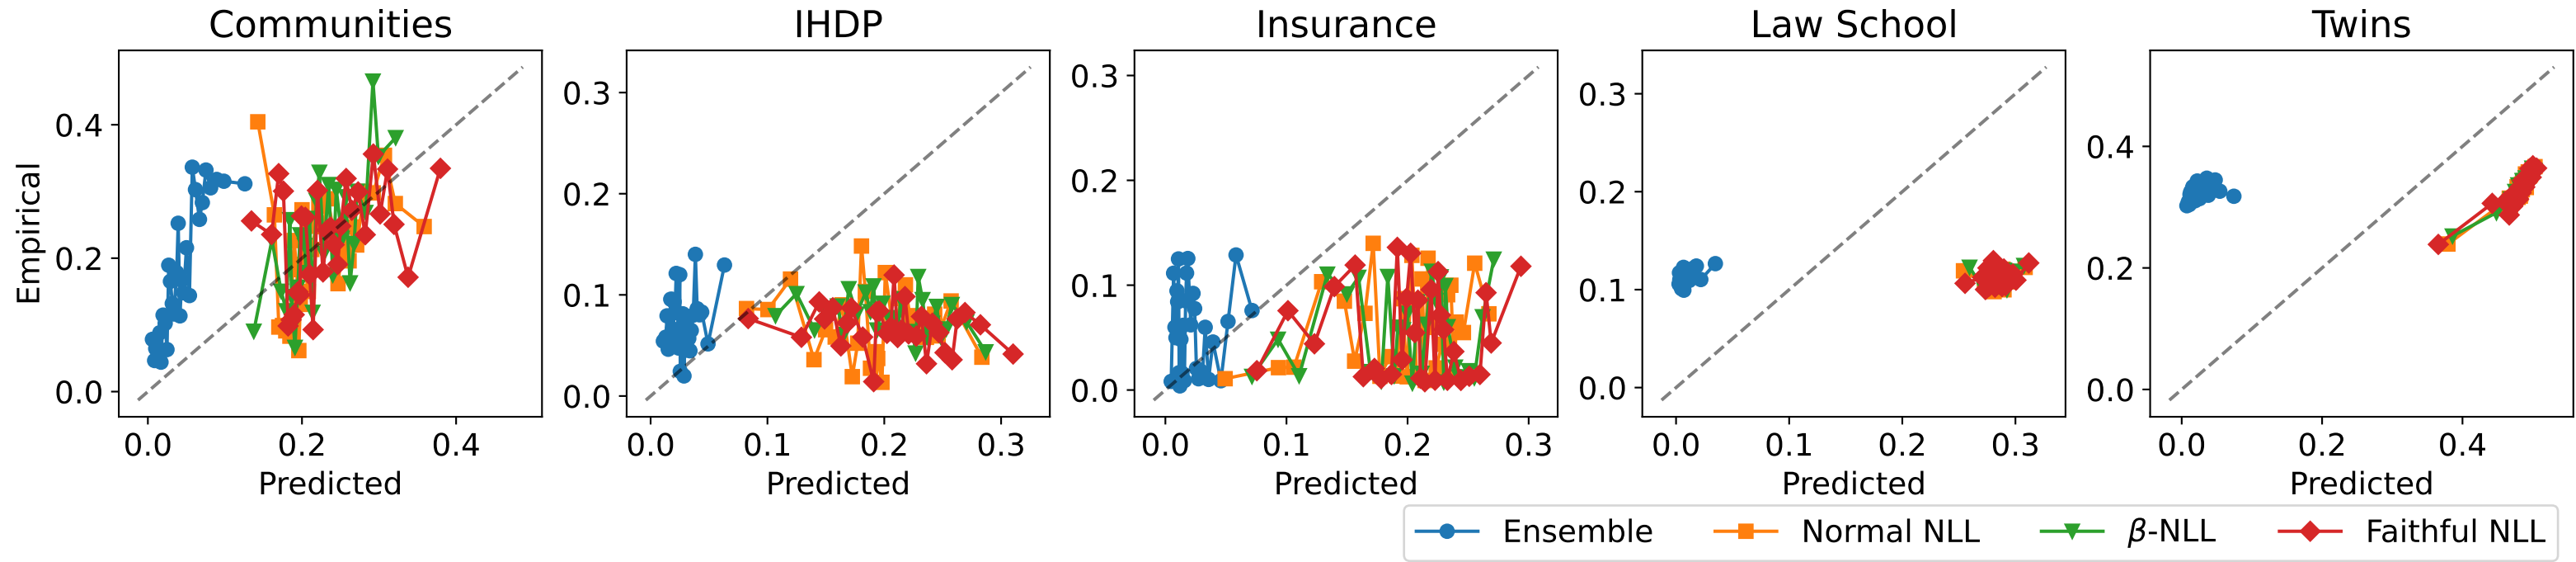

Supplement: supplementary_material [file attachment]

# Calibration for 25 Groups

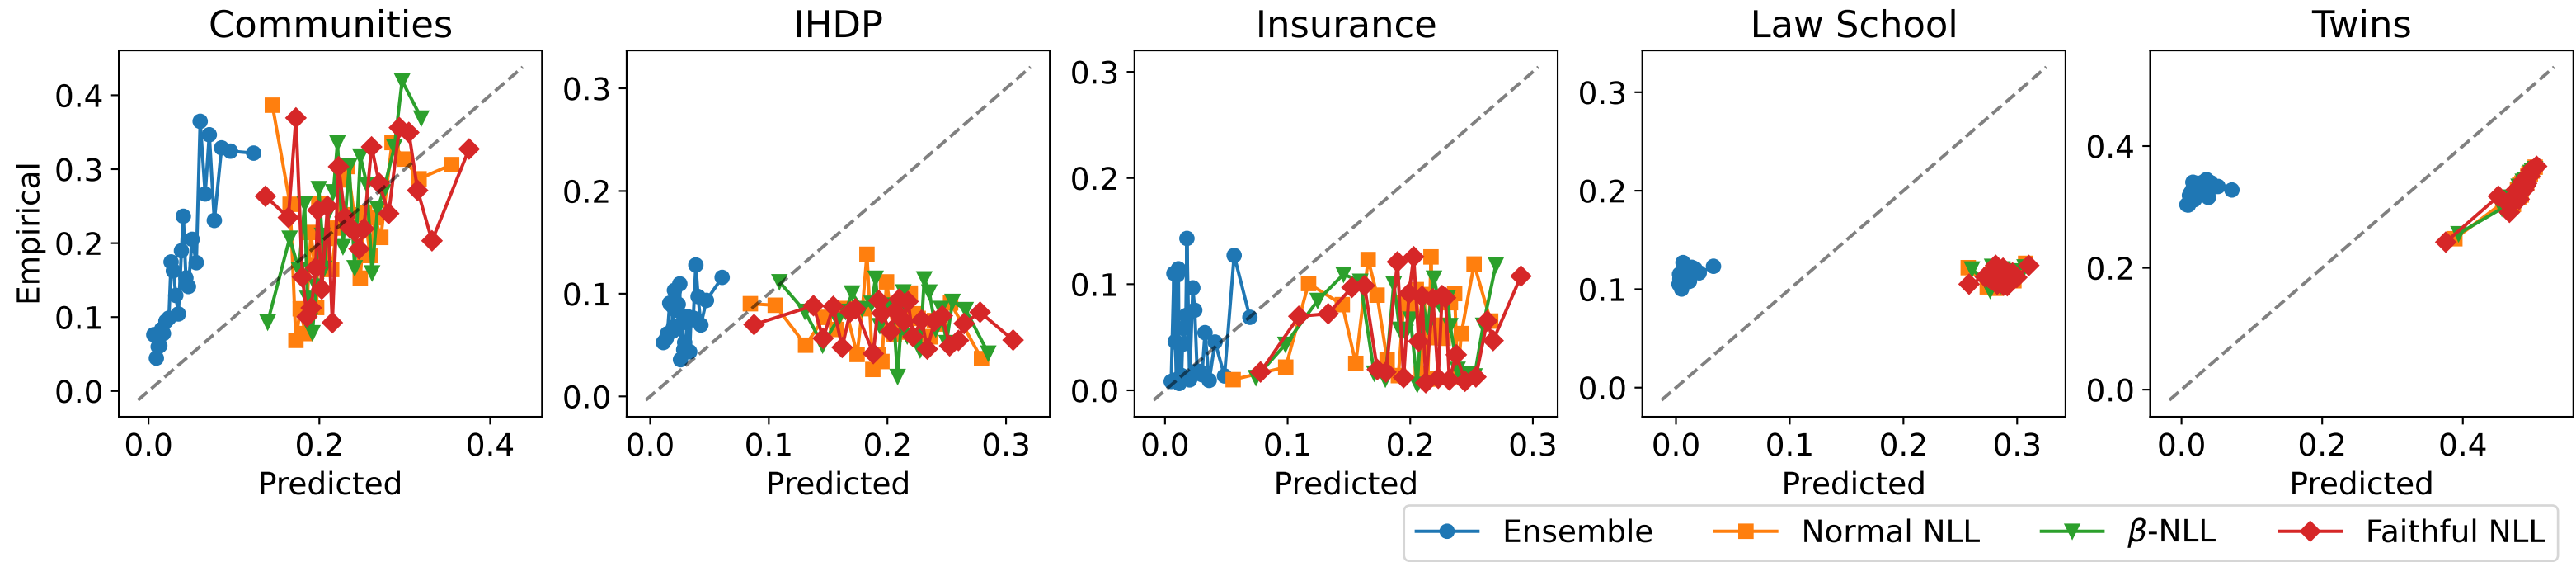

Supplement: supplementary_material [file attachment]

Distribution A

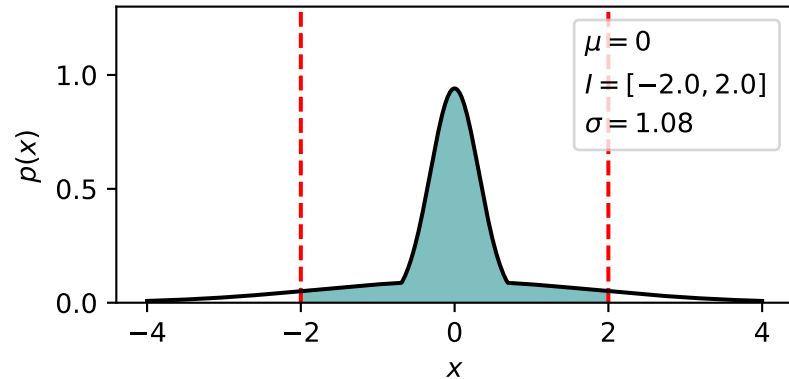

Distribution B

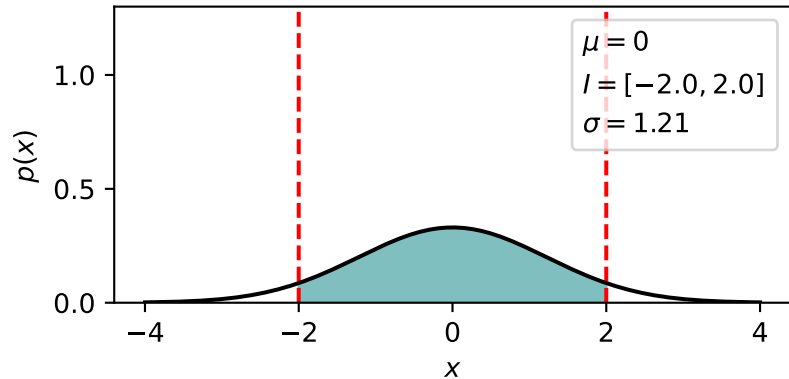

Supplement: supplementary_material [file attachment]

Normal and Induced Binomial Distribution  
 $\mu=0.8$ ,  $\sigma=0.1$ ,  $\tau=0.5$

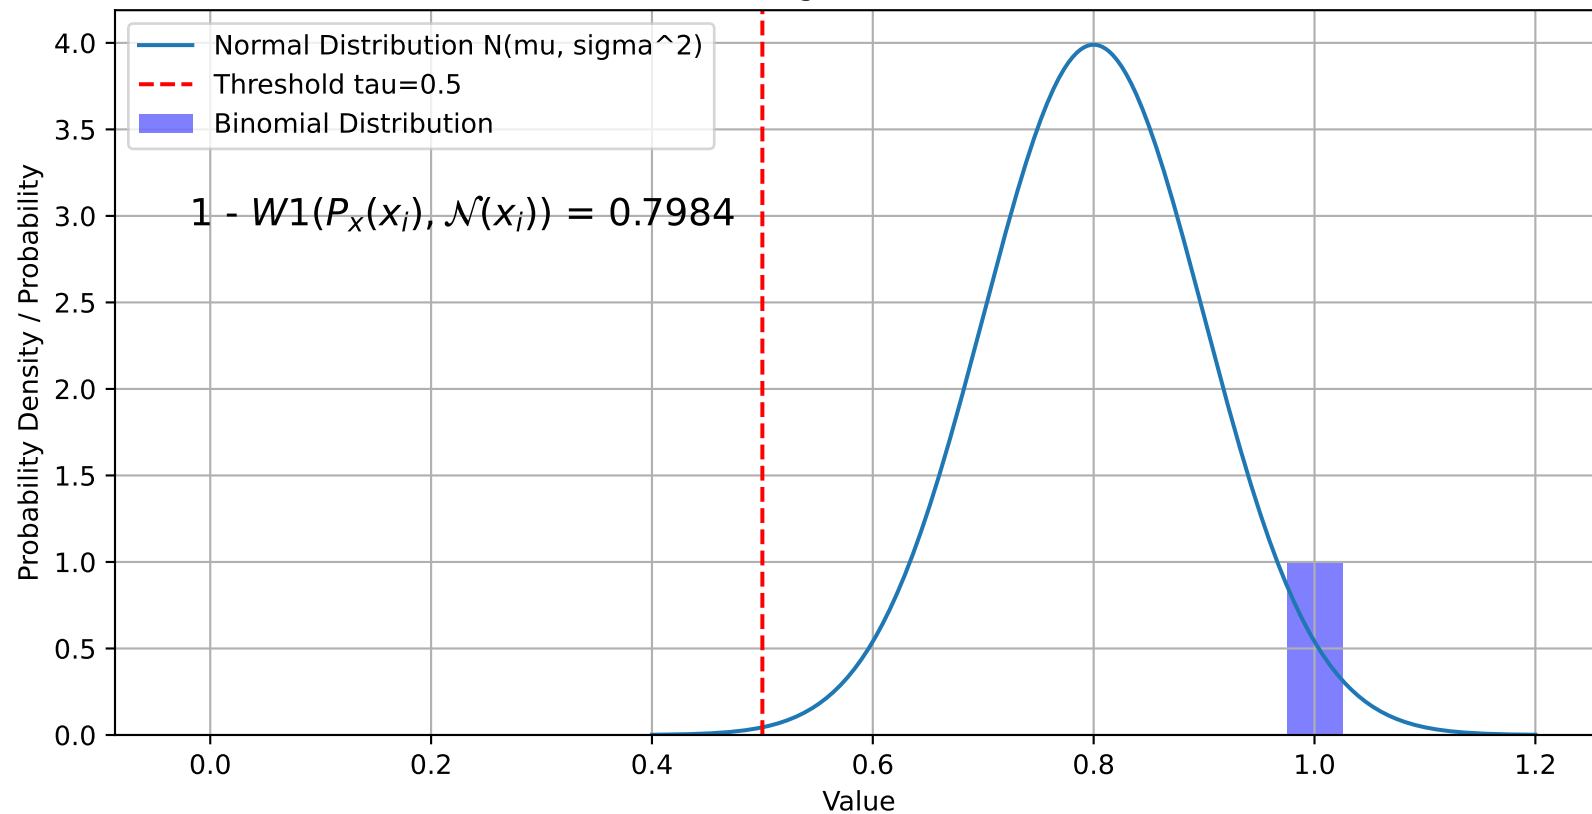

Supplement: supplementary_material [file attachment]

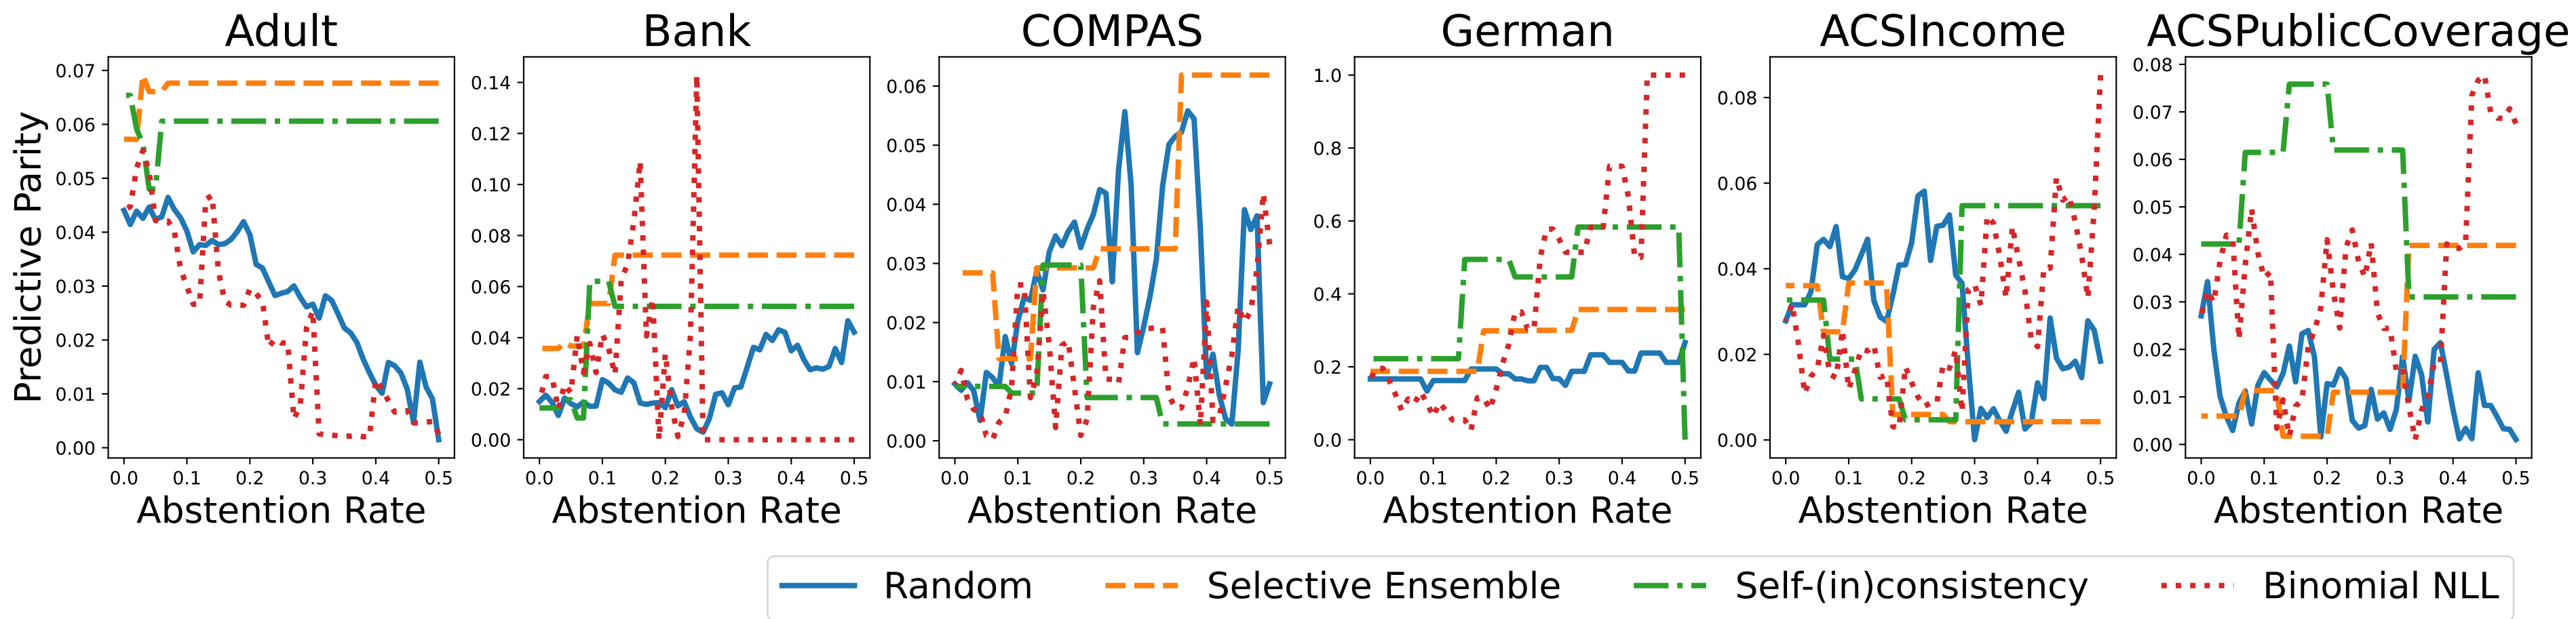

Supplement: supplementary_material [file attachment]

# Calibration for 10 Groups

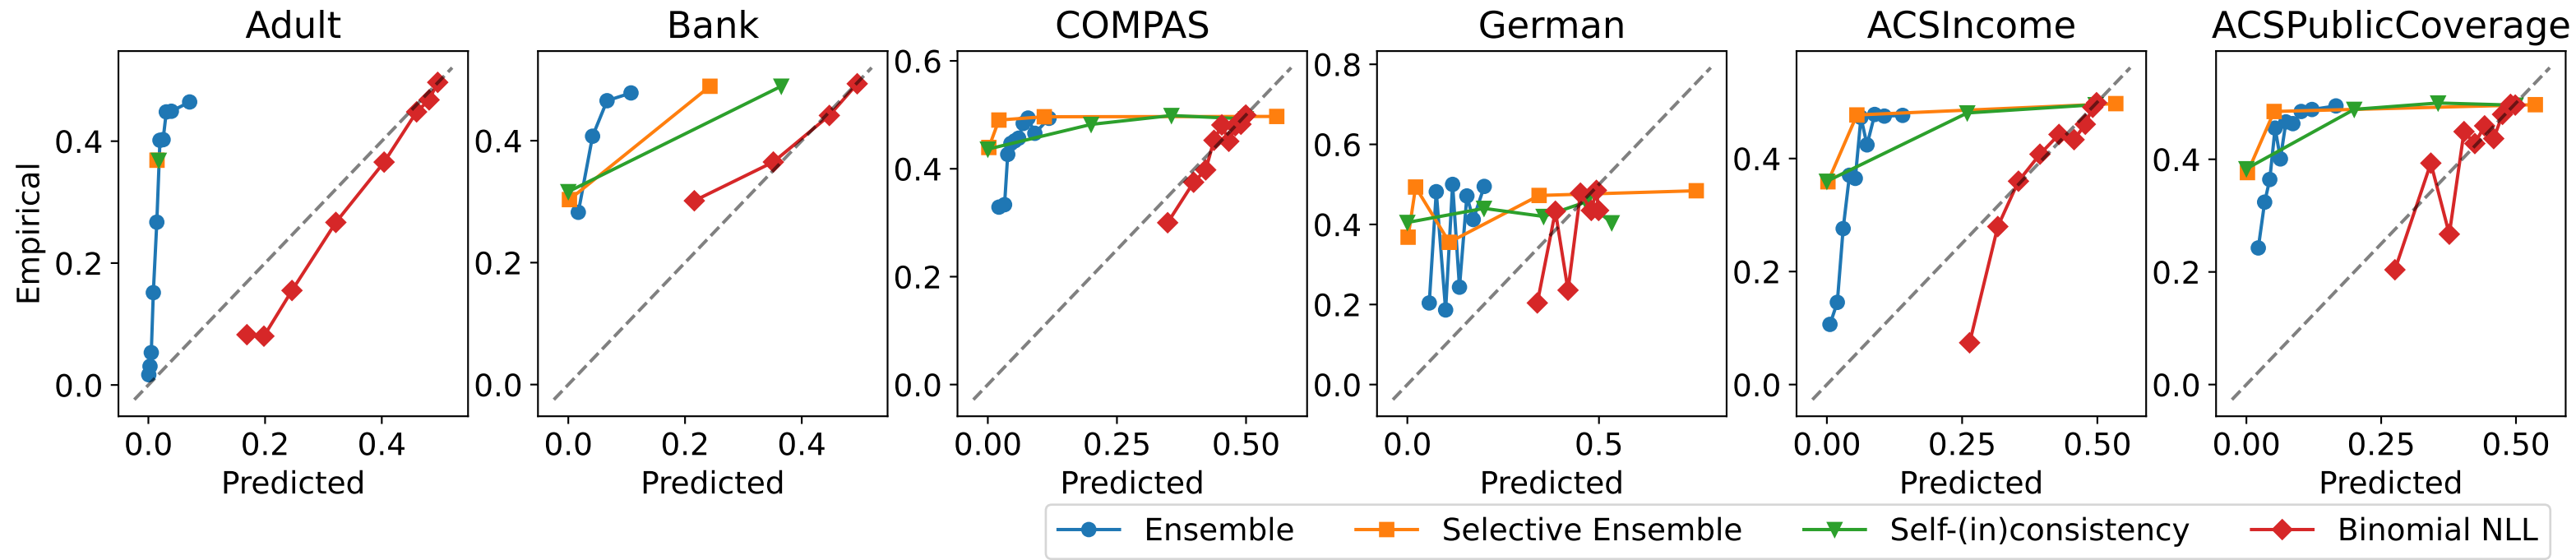

Supplement: supplementary_material [file attachment]
